# Supplementary material for: Soil dielectric characterization at L-band microwave frequencies during freeze-thaw transitions
Source: Copernicus journal article supplement (doi:10.5194/hess-2020-291), 2020-07-10
Supplement: Supplementary file [file hess-2020-291-AC1-supplement.pdf]

**Revision of Manuscript: “Soil dielectric characterization during freeze-thaw transitions using L-band coaxial probe and soil moisture probes” by Alex Mavrovic *et al.***

In blue: Reviewer’s comments.

R= Reviewer; P = Page; L = Line as they appear in the Original manuscript version

G= General comment followed by numbering

In black: Answers to referees.

P=Page; L=Line; Track change version

*In black and italic: Modification added to text.*

**Comments from the Reviewers:**

**Reviewer #1:**

**Synopsis:**

This manuscript describes a laboratory experiment in which the relative dielectric permittivity at L-band of a variety of different types of soil are measured during the freeze <-> thaw process with a dedicated microwave open-ended coaxial probe (OECF) and a commercial soil moisture probe: Hydraprobe (HP). The measurements with both the OECF and HP show a clear hysteresis effect associated with the freeze and thaw process in the graphs of complex relative dielectric permittivity (epsilon) versus soil temperature. Although there are some differences in the measured epsilon between the OECF and HP the authors argue that soil moisture sensors such as HP, which are relatively cheap, tested and verified, can be used construct validation networks for passive microwave remote sensing. Additionally, the manuscript addresses that current models for soil epsilon don’t incorporate the freeze <-> thaw hysteresis effect.

The experiment, its results, and proposed application in building validation networks for soil dielectric permittivity with soil moisture probes, I consider as a valuable contribution to the microwave remote sensing community. The title does not fully reflect the contents of the paper, I think you could add "with a soil moisture probe" in the end. Description of the experimental design should be improved. Also the description and explanation of the observed freeze <-> thaw hysteresis should be more elaborate. Finally, throughout the paper the structure of the sentences can be improved.

We made substantial improvement to the manuscript by adding more details on the experimental design and the models’ equations and assumptions. The explanations of the freeze/thaw hysteresis effect were also expended to highlight the impact of the temperature transition speed and the temperature sensing volume versus the permittivity sensing volume on the hysteresis amplitude. Finally, the title was adjusted to better reflect the objectives of the study.

**Specific comments:**

[1] R1, P6, L188 and Fig. 3: "The OECF and HP were fully... " Why was the OECF inside the OBS soil sample and not inside the other three soil samples? And if it was buried inside the OBS sample would not this disturb the sample? I suppose the sample structure was better preserved in the configuration of figure 3b.

The OECF was buried in the OBS soil sample by digging a small-scale trench, alike soil moisture probes are generally installed in the field. The horizontal position of the OECF fully places the probed volume in the undisturbed soil. The OECF was fully buried in the OBS soil sample to simplify the installation. Since the other three samples were smaller, the setup requires that part of the OECF stands out of the container to assure the probed volume stays within the soil samples. Details were added to this paragraph about the experimental setup.

P6-7, L212-214: The OECF and HP were *horizontally inserted into undisturbed soil* and centered at a depth of 2.5 cm below the soil surface *with sufficient spacing between the probes and the soil samples edges to ensure that the probed volumes are restricted to the limits of the soil samples* (Fig. 3).

[2] R1, G1: General remark on the samples and measurement setup. With the OBS sample HP measurements were taken at three positions. As Figure 5 shows the measured responses at these three positions varies. Why were there not also measurements at multiple positions for the OECF with the OBS sample? And why were the other 3 samples not also measured with the HP (and the OECF) at multiple positions? Was this because the OBS sample was expected to be less homogeneous due to the organic content? And why only one sample per soil type was measured? The choices the authors made in this regard should be explained in the text, even if simply for practical reasons.

The OECF is a promising instrument currently developed by the Université de Trois-Rivières and Université de Sherbrooke. Only one OECF was available for the experiment. Logistics is the primary reason for the difference in setup between the OBS soil samples and the others, the soil sample collections were not made in the same type of container for all sites. Even if the cylinder samples are smaller in size, the probed were properly positioned to ensure reliable measurements (see previous response to comment R1[1]). The repeatability of the measurements gives us confidence that the experimental protocol is robust. The explanation for the two distinct setups was added.

P7, L216-218: *The Fig. 3a and 3b setup discrepancies only reflect the two distinct containers used for soil collection at different sites, both configurations ensured sufficient spacing for undisturbed measurements.*

[3] R1, P7, L243: The amplification of the hysteresis -effect by the setup, is it possible to explain this in the text with a few sentences? You refer to this hysteresis amplification later on, it would be better if the reader could find an explanation for this effect in this manuscript rather than somewhere else (the reference). You can of course leave the reference.

Further explanations and reference were added.

P8-9, L286-291: Hysteresis effects can be observed between the freezing and thawing cycles in Figs. 5 through 8, *i.e. a different behavior of permittivity variation depending on whether the ground freezes or thaws*. Although hysteresis is reported in soil freezing studies, *this effect was amplified by the temperature transition speed and differences in the sensing volume for temperature and permittivity observations (Pardo Lara et al., 2020)*. Fig. 11 shows a slow freeze/thaw transition displaying a hysteresis effect of diminished amplitude, but still noticeable.

P9-10, L321-323: Even if amplified by the experimental setup, the hysteresis effect between the freezing and thawing cycles is not simulated by any model since *they do not include the evolution of soil properties in time*.

[4] R1, P8, L252-255: I am not sure whether I completely agree with your explanation. You ascribe the difference in measured transition to the different probing volumes of both sensors and that with the HP there is a longer time required for the freezing/thawing front to penetrate the probed volume. The way I see it for both sensors the temperature gradient is from top/bottom (because of your nice trick of placing sand around the sample) so ideally the progression of this freezing/thawing front is the same for both sensors. What is different is the diameter of the sensor's probing volume, see Figure 2. For the OECP this is roughly half the diameter of the HP, which would explain a more abrupt transition. Another difference is the length of the probing volume. For wet conditions the length for the HP is about 15x that of the OECP. The way I see it the HP then performs 15 OECP measurements at 15 different positions. If there is variation in the soil over this length, the HP then shows a kind of average transition over all these 15 volumes. This is the reason I was also wondering why the OECP was not used at multiple positions within one sample (comment [2]). You could maybe test your volume explanation by taking the OECP result and scale it to the HP volume.

We agree that the freezing/thawing front is mostly vertically oriented and therefore is the probes' volume diameter difference that is mostly responsible for the difference in transition steepness. Clarifications about the point were added. The suggested experiment of using several OECP at different positions is a relevant one, but as mentioned previously, only one probe was available for the experiment, while removing the probe to measure at different depths would have changed the soil properties. Comparing the average of several OECP measurements to the HP measurement would possibly give further insights on the OECP and HP comparability.

P9, L311-315: Since the instruments measure an average permittivity for the whole probed volume, *the larger probed volume of the HP record an extended freeze/thaw transition because of the longer time required for the freezing/thawing fronts to penetrate the depth of volume probed. Since the freezing/thawing front is mostly vertically oriented, it is the difference in probes' sensing diameter that causes the difference in transition steepness*.

[5] R1, Fig. 5-8: During the thawing process there appears to be maximum epsilon' and epsilon" directly after the main thawing process after which the epsilon' and epsilon" decrease again slightly. This effect is most pronounced in Figure 7. Do you have an explanation for this effect?

It is suspected that this effect is due to water percolation during thawing, but further investigation is needed to confirm this phenomenon. This hypothesis was added to the discussion.

P9, L306-309: *In most experiments presented, a short surge in permittivity can be observed right after thawing, followed by a small drop leading to a convergence to a relatively stable permittivity value associated with a fully thawed soil. Further investigation is needed to see if this short surge could be related to moisture migration toward the thawing front and to water percolation through the soil sample toward the end of the thawing transition.*

[6] R1, P8, L270-272: Based on the Figures 5 - 8 I find the freeze/thaw transitions not similar. Can the differences of the OECP and HP measurements be explained by the difference in probing volume? Also you mention that the main difference between the OECP and HP measurements are the epsilon values at the end of the cycle, at the "stable plateaus" as you call it. But isn't the hysteresis just as important? Perhaps if a found calibration equation for a given soil is applied to the HP results the freeze/thaw hysteresis is more like that of the OECP?

It is correct that the difference in freeze/thaw transition steepness could be explained by the difference in probing volume. The authors share the same point of view that this is probably the main explanation and it is put forward in the Experimental Results section (4.1).

The fully frozen/thawed values comparison between measurements and models consist of the strongest differences observed in this study. The hysteresis is of equal importance, but the trends are similar between the permittivity measurements. This is to say that the hysteresis effect occurs at very similar temperatures.

It is typical to use soil specific calibration equation to produce soil moisture estimates from HP raw permittivity measurements. However, the HP instrument does not allow for customized calibration equation to compute permittivity from raw reflection coefficients.

P9, L 310-315: It can also be observed that the freeze/thaw transition measurements are *steeper* with the OECP than the HP. This is probably due to the HP's larger probed volume. Since the instruments measure an average permittivity for the whole probed volume, a larger probed volume will record a *more extended* freeze/thaw transition because of the longer time required for the freezing/thawing fronts to penetrate the depth of volume probed. *Since the freezing/thawing front is mostly vertically oriented, it is the difference in probes' sensing diameter that causes the difference in transition steepness.*

[7] R1, P8, L283-289: What do the authors want to say with this paragraph? Is the point that, should a network of (tried, tested, and cheap) hydraprobes be installed over a large area as surrogate L-band permittivity sensors (lines 274 – 275), one must realize that the volume over which it measures is not exactly what radiometers probe?

The potential in using already deployed HydraProbes networks is laid out in the previous paragraph. The message of this paragraph is that in the case of freeze/thaw algorithms testing, previous studies have shown that the L-band radiometric signal is sensitive to the freezing of the first centimeter of soil which implies that the OECP would be a more suitable instrument to study that phenomenon due to its inherent smaller sensing volume. The paragraph was reshaped to get this point across more clearly.

P10, L348-351: *Ground- and satellite-based L-band radiometric measurements are very sensitive to the freezing of the first centimeter of soil (Rowlandson et al., 2018; Roy et al., 2017a,b; Williamson et al., 2018). Therefore, the shallower depth (~ 0.4–1 cm) and smaller volume (~4–10 cm<sup>3</sup>) probed by the OECP makes it a potentially more suitable instrument to study the freeze/thaw signal observed from L-band radiometers.*

[8] R1, P9, L300: What hypothesis do the authors refer to?

The hypothesis referred is the one proposed in the previous paragraph about the correlation between the hysteresis effect and the temperature transition speed. It was clarified to avoid further confusion.

P11, L362-363: *We further tested the hypothesis that the hysteresis effect is correlated with the temperature transition speed* using an OBS soil sample using a slower freeze/thaw transition rate.

[9] R1, Fig. 11: With the freezing cycle you see both epsilons increase first before they decrease rapidly when all soil freezes. Why don't we see this behaviour during of the freezing fast freeze/thaw experiment? We do see it during the thawing (see comment [5]), are these processes linked?

It is hypothesized that water displacement inside the sample during freezing is responsible for this surge, similar to the explanation of the surge in Fig. 5-8 (see response to comment R1[5]).

[10] R1, P1, L20: You state that you show in the manuscript that the OECP is a suitable device for measuring epsilon... . The demonstration that OECP can measure the epsilon of any homogeneous material is given in your previous studies Mavrovic2018 and Mavrovic2020, not in this manuscript. In this manuscript you use the OECP to quantify the performance of the HP. I propose to change the sentence to .. the OECP measured the frozen soil epsilon' to be 3.5 to 6.0, the epsilon" to be 0.4 – 1.2 etc.

Suggestion applied and text modified.

P1, L21: *The OECF measured the frozen...*

[11] R1, P2, L41-42: Cite not only papers that use the tau-omega model for microwave scattering of vegetation. Give examples of papers that solve the radiative transfer equations differently, such as the Tor Vergata model (Bracaglia, Ferrazzoli, and Guerriero, RSE, 1995) or the MIMICS model (Ulaby, Sarabandi, et al., 1990 IJRS).

References to radiative transfer models added.

P2, L39-42: Information about the physical state of the soil is retrieved from microwave observations by using radiative transfer models to simulate the interaction between electromagnetic waves and the surface (*Attema and Ulaby, 1978; Mo et al., 1982; Ulaby et al., 1990; Bracaglia et al., 1995; Huang et al., 2017*).

P12, L418-419: *Attema, E., and Ulaby, F.: Vegetation modeled as a water cloud. Radio Sci., 13(2), 357-364, doi:10.1029/RS013i002p00357, 1978.*

P13, L429-430: *Bracaglia, M., Ferrazzoli, P., and Guerriero, L.: A fully polarimetric multiple scattering model for crops, Remote Sens. of Environ., 54(3), 170-179, doi:10.1016/0034-4257(95)00151-4, 1995.*

P17, L664-665: *Ulaby, F., Sarabandi, K., McDonald, K., Whitt, M., and Dobson, M.: Michigan microwave canopy scattering model, Int. J. Remote Sens., 11(7), 1223-1253. doi:10.1080/01431169008955090, 1990.*

[12] R1, P2, L50: Propose to change to: "Permittivity is characterized by a complex number, where the real part describes the translation and rotation of molecular dipoles, which drive the wave propagation, and the imaginary part describes the energy loss associated with this process." Further I propose to refer to a textbook on electrodynamics, for example: Griffiths D.J., Introduction to Electrodynamics.

Suggestion implemented. The Griffiths is a well-known reference to the author, it was added.

P2, L52-54: Permittivity is characterized by a complex number, where the real part ( $\epsilon'$ ) describes the *translation and rotation* of molecular dipoles, which drives *the* wave propagation, and the imaginary part ( $\epsilon''$ ) describes the *energy loss (absorption) associated with this process* (Griffiths, 1999).

P14, L501-502: *Griffiths, Introduction to electrodynamics - Third Edition, Pearson, Upper Saddle River, New Jersey, 576 pp., 1999.*

[13] R1, P2, L63: remove the word passive here.

``passive`` removed.

P2, L65-66: The permittivity drop observable within freezing soils translates into a higher microwave emission from the ground.

[14] R1, P3, L75: "to collect permittivity estimates", propose to change to "to collect better permittivity estimates." Also "... for the validation of passive microwave instruments". Propose to change to ".. for the validation of microwave radiometric observations". Or something similar, but it's the observations than need to be validated.

Suggestion implemented.

P3, L79-80: Therefore, there is a need to collect *better* permittivity estimates for the validation of *microwave observations and models*.

[15] R1, P3, L86: Add OECP between assess and L-band.

Added.

P3, L91: The goal of this laboratory-based study is to assess *OECP* L-band permittivity measurements...

[16] R1, P4, L109: The reflectometer generates an electromagnetic wave, not only a propagating electric field.

Clarified.

P4, L113-114: This reflectometer acts as both *an electromagnetic wave generator and a reflection coefficient measuring instrument for frequencies from 1 to 2 GHz*.

[17] R1, P4, L110: Over what frequency band were the measurements performed?

Specified.

P4, L113-114: This reflectometer acts as both *an electromagnetic wave generator and a reflection coefficient measuring instrument for frequencies from 1 to 2 GHz*.

[18] R1, P4, L116: "The penetration depth of the..." This sentence is too vague for my taste. I propose something like: "The sensing depth of the OECP is the maximum depth at which the medium is polarized due to the incident electric field, and as such contributes to the reflection of the EM wave backwards into the coax."

Sentence reworked.

P4, L120-127: The *sensing* depth of the OECP is defined as the maximal depth at which a medium is *polarized due to the incident electric field, and as such contributes to the electromagnetic wave reflection. The sensing depth is proportional to the medium's permittivity and the magnitude of the electric field generated by the reflectometer, which*



*displays a constant power output of 10 dBm (Fig. 1b). The OECP typical sensing depth approaches 1 cm under dry soil conditions and the cylindrical probed volume is about 3.5 cm wide in diameter (Figure 2). Under wet soil conditions, the sensing depth shrinks down to 0.4 cm.*

[19] R1, P4, L118: "The magnitude of this effective electric... " the effective electric field has not been defined or explained previously. I assume you refer the resulting electric field in the medium? Which is the sum of the original electric field coming from the coax E0, which polarizes (rotates and or translates) the molecules and the electric field produced by the rotated or displaced molecules themselves Ed. Latter counters E0, which counters Ed, which counters E0 etc. You end up with a resulting electric field E, which is actually lower in magnitude for a higher epsilon.

The effective electrical field refers here to the extent of the electrical field influencing the reflection coefficient measurements. The use of this term here seems confusing and not necessary. Therefore, it was removed and the sensing depth was directly referenced.

P4, L122-124: *The sensing depth is proportional to the medium's permittivity and the magnitude of the electric field generated by the reflectometer, which displays a constant power output of 10 dBm (Fig. 1b).*

[20] R1, P4, L119: You describe the electric field generated by the reflectometer in terms of power (dBm = 1 mW) which is incorrect. I propose to state simply that the generated power is 10 dBm.

Clarified.

P4, L122-124: *The sensing depth is proportional to the medium's permittivity and the magnitude of the electric field generated by the reflectometer, which displays a constant power output of 10 dBm (Fig. 1b).*

[21] R1, P4, L131: If applicable, note what type of Hydraprobe you used (for example type A or B100 or ...)

Precisions were added on the HydraProbe used for this experiment.

P4, L137: *A digital model of the HP using the SDI-12 protocol was employed.*

[22] R1, P4, L137: ".. it uses the ratio of the incident and reflected waves to numerically solve Maxwell's equations, yielding the impedance and complex permittivity." That the device solves the Maxwell's equations sounds far-fetched to me. One of the papers on found on the Hydraprobe website should provide you with a better (quick) description on how the device works. In my understanding the Hydraprobe indeed works similar to the OECP: The epsilon of the material between the steel tines determines the characteristic impedance (symbol Z0 typically, or its inverse the characteristic admittance Y0) . The reflection of the The steel tines, together with the material (soil) they are in, forms a



microwave transmission line with characteristic impedance  $Z_0$  (or its inverse  $Y_0$ ). The reflection coefficient, measured by the device, is dependent on this  $Z_0$ .

The HydraProbe Soil Sensor User Manual (2018) section 4.4.1 (p.34) on the theory of operation cites more comprehensive references on how the numerical solution of Maxwell's equations is obtained to derive the complex permittivity from impedance measurements. Those references were added.

P4, L141-143: *The HP soil complex permittivity computation is derived from the impedance measurements between the steel tines, which depends mainly on the liquid water content of the soil surrounding the tines (Campbell, 1990; Seyfried and Murdock, 2004).*

P13, L439-440: *Campbell, J.: Dielectric Properties and Influence of Conductivity in Soils at One to Fifty Megahertz, Soil Sci. Soc. Am. J., 54(2), 332-341, doi:10.2136/sssaj1990.03615995005400020006x, 1990.*

P17, L654-655: *Seyfried, M., and Murdock, M.: Measurement of Soil Water Content with a 50-MHz Soil Dielectric Sensor, Soil Sci. Soc. Am. J., 68(2), 394-403, doi:10.2136/sssaj2004.3940, 2004.*

[23] R1, P4, L140: mention  $\pm 0.01$  and  $\pm 0.03$  are uncertainties.

Added.

P4-5, L144-147: Thus, the HP measures real and imaginary soil permittivities (*uncertainties of  $\pm 0.2$  or  $\pm 1\%$ , whichever is greater*) as well as temperature ( $\pm 0.3^\circ\text{C}$ ). From these two variables, soil moisture is estimated using an empirical relationship calibrated for the given soil type (*uncertainties between  $\pm 0.01$  and  $0.03$  volumetric water content depending on soil type*), with...

[24] R1, P6, L185: It confused me whether the samples were collected from the temperature chamber or from the sites. It is the latter I understand? Further, I propose to use distinguishing names. Call the PVC boxes with the collected soil 'samples' as is, but refer to the cardboard boxes, filled with samples and surrounding sand, with a different name. Maybe sample assembly. Indicate these names in Figure 3. This way you can mention for example that the "sample assemblies were placed in the temperature chamber and were subjected to 3 (? mention this as well) freeze/thaw cycles".

Clarifications were added about the distinction between the collection of the samples at the study sites and the freeze/thaw cycles experiment in the temperature-controlled chamber. The components of the sample assembly were identified in Fig. 3. The soil samples underwent 2 or 3 freeze/thaw cycles, which is now specified.

P6, L204-206: Continuous permittivity measurements were conducted on the mineral and organic soil samples going through *two or three* consecutive freeze/thaw cycles in a NorLake2 mini-room walk-in controlled temperature-controlled chamber...

P6, L207-209: The soil samples *were previously collected from their respective study sites (see Sect. 3.2)* in PVC or plastic containers. *The OBS sample was collected using a rectangular container, while the other samples were collected using cylindrical containers.*

Fig. 3: Updated in manuscript.

[25] R1, P7, L243 – 246. Authors state that trends of OECP and HP are "very similar" and the fully frozen/thawed epsilon values are "also similar". I disagree with this description. Judging from Figures 5 - 8 there are significant differences. These differences and explanations for their causes are discussed further down in the text.

The similarity mentioned here was meant to point at the closer similarities between OECP and HP measurements than the model estimates. Since the model results are discussed in the next section, the sentence was reformulated to remove this mention.

P9, L294-296: The HP measurements show trends *in agreement with that of* the OECP measurements during freeze/thaw transitions, especially for the real permittivity, *although the fully frozen and thawed permittivity values display soil type dependent offsets* between the OECP and HP measurements (Tables 2 and 3).

[26] R1, P7, L251: ".. the freeze/thaw transition measurements are smoother with the HP than..." Perhaps there is a better alternative for "smoother", perhaps "less abrupt"? Also sentence should be "We also observe that the measured freeze/thaw transitions are less abrupt (?) with the measurements of the HP than with the OECP." Same for line 261.

The term ‘smooth’ was replaced through the manuscript by the terms ‘steeper’, ‘continuous’ and ‘extended’ depending on the context.

P5, L167-169: Zhang's model evaluates the unfrozen water fraction ( $f_w$ ) in soil near the freezing point in order to obtain a continuous transition between the solid and liquid phases of water.

P9, L310: It can also be observed that the freeze/thaw transition measurements are *steeper* with the *OECP* than the *HP*.

P9, L311-313: Since the instruments measure an average permittivity for the whole probed volume, a larger probed volume will record a *more extended* freeze/thaw transition because of the longer time required for the freezing/thawing fronts to penetrate the depth of volume probed.

P9, L320-321: Zhang's model estimates the ice fraction for a given sub-freezing temperature, displaying a *continuous* freeze/thaw transition.

P11, L374-376: Based on our simulations, ice fraction representation in Zhang's model results in a more physically appropriate representation of processes around the freezing point and results in *freeze/thaw* transitions *closer to observations*.

[27] R1, P10, L325 - 327: The question whether the OECF correctly measures the epsilon in not shown in this manuscript. It is implied by your earlier work, see also comment [10].

The reliability of OECF measurements are not thoughtfully investigated in this study, although confidence in the reliability of the measurements can be inferred from the repeatability through freeze/thaw cycles. The conclusion was adapted to shift focus from OECF reliability to soil permittivity results and a hint to OECF measurements repeatability was added in the Results section.

P8, L281-282: *The repeatability of the OECF measurements can also be seen as an indicator of the reliability of the measurements.*

P11, L387-392: *This study presents soil microwave permittivity measurements during freeze/thaw transitions in the same frequency range as the SMAP and SMOS satellites, as well as future L-band satellite missions. The permittivity measurements were taken using a novel open-ended coaxial probe (OECF). It is shown that lower frequency (MHz) soil permittivity probes can be used to estimate microwave permittivity given proper calibration relative to an L-band probe, which holds significant potential considering the already widespread operational networks of low frequency soil permittivity probes deployed to measure soil moisture.*

[28] R1, Fig. 5 – 8: To make comparison easier I propose to let all figures have the same axis limits for epsilon' and epsilon", even if this implies having only one figure per page. Further I would recommend using more contrasting colours for the curves and to plot the graphs in vector format (PDF).

The color palette of figures 5 to 8 was changed to increase color contrast. The authors would prefer to stay with variable y-axis since the data from figure 7 would be hardly visible if put at the same scale of figure 8 (i.e. it would occupy a third of the graph for in the real permittivity graph and a sixth in the imaginary permittivity graph).

Figures 5-8: Updated in manuscript.

[29] R1, Tables 2 and 3: Besides the absolute uncertainty also indicate the relative uncertainty.

Relative uncertainties were added aside absolute values in Table 2 and 3.

Table 2: ... *Absolute and relative* uncertainties (in parentheses) are based on instrument precision and measurement variability.

Table 2 and 3: Updated in manuscript.

# Soil dielectric characterization during freeze-thaw transitions using L-band coaxial probe and soil moisture probes

Alex Mavrovic<sup>1-2</sup>, Renato Pardo Lara<sup>3</sup>, Aaron Berg<sup>3</sup>, François Demontoux<sup>4</sup>, Alain Royer<sup>5-2</sup>, Alexandre Roy<sup>1-2</sup>

<sup>1</sup> Université du Québec à Trois-Rivières, Trois-Rivières, Québec, G9A 5H7, Canada

<sup>2</sup> Centre d'Études Nordiques, Université Laval, Québec, Québec, G1V 0A6, Canada

<sup>3</sup> University of Guelph, Guelph, Ontario, N1G 2W1, Canada

<sup>4</sup> Laboratoire de l'Intégration du Matériau au Système, Bordeaux, 33400 Talence, France

<sup>5</sup> Centre d'Applications et de Recherches en Télédétection, Université de Sherbrooke, Sherbrooke, Québec, J1K 2R1, Canada

*Correspondence to:* Alex Mavrovic (Alex.Mavrovic@uqtr.ca)

**Abstract.** Soil microwave permittivity is a crucial parameter in passive microwave retrieval algorithms but remains a challenging variable to measure. To validate and improve satellite microwave data products, precise and reliable estimations of the relative permittivity ( $\epsilon_r = \epsilon/\epsilon_0 = \epsilon' - j\epsilon''$ ; unitless) of soils are required, particularly for frozen soils. In this study, permittivity measurements were acquired using two different instruments: the newly designed open-ended coaxial probe (OECF) and the conventional Stevens HydraProbe. Both instruments were used to characterize the permittivity of soil samples undergoing several freeze/thaw cycles in a laboratory environment. The measurements were compared to soil permittivity models. The OECF measured frozen ( $\epsilon'_{\text{frozen}} = [3.5; 6.0]$ ,  $\epsilon''_{\text{frozen}} = [0.46; 1.2]$ ) and thawed ( $\epsilon'_{\text{thawed}} = [6.5; 22.8]$ ,  $\epsilon''_{\text{thawed}} = [1.43; 5.7]$ ) soil microwave permittivity. We also demonstrate that cheaper and widespread soil permittivity probes operating at lower frequencies (i.e. Stevens HydraProbe) can be used to estimate microwave permittivity given proper calibration relative to an L-band (1–2 GHz) probe. This study also highlighted the need to improve dielectric soil models, particularly during freeze/thaw transitions. There are still important discrepancies between *in situ* and modelled estimates and no current model accounts for the hysteresis effect shown between freezing and thawing processes which could have a significant impact on freeze/thaw detection from satellites.

**Keywords:** Open-ended coaxial probe, Freeze-thaw cycles, Soil permittivity, Microwave radiometry, Soil emission modelling

## 1 Introduction

The current generation of L-band (1–2 GHz) satellite-based radiometers offers a unique opportunity to monitor soil moisture and freeze/thaw cycles due to its global coverage and revisit time of only a few days (Kerr et al., 2012; Roy et al., 2015; Rautiainen et al., 2016; Colliander et al. 2017; Derksen et al., 2017; Wigneron et al., 2017). These satellites include the European Space Agency Soil Moisture Ocean Salinity mission (SMOS; Kerr et al., 2010), the National Aeronautics and Space Administration (NASA) Soil

Moisture Active Passive mission (SMAP; Entekhabi et al., 2010) and the NASA/CONAE (Comisión Nacional de Actividades Espaciales) joint Aquarius mission (Le Vine et al., 2010). Information about the physical state of the soil is retrieved from microwave observations by using radiative transfer models to simulate the interaction between electromagnetic waves and the surface (Attema and Ulaby, 1978; Mo et al., 1982; Ulaby et al., 1990; Bracaglia et al., 1995; Huang et al., 2017). Such models have already been applied to obtain information on the characteristics of snow cover (Lemmetinen et al., 2016), the state of vegetation (Mo et al., 1982; Rodríguez-Fernández et al., 2018, Fan et al., 2018), soil moisture (Kerr et al., 2012; Mialon et al., 2015; Colliander et al. 2017) and soil freeze/thaw state (Kim et al., 2012; Rautiainen et al., 2016; Derksen et al., 2017; Roy et al., 2017a, 2018 and 2020; Prince et al., 2019).

Permittivities of the landscape constituents are crucial components of the dielectric models used to solve the electromagnetic equations governing the interaction between microwave and surface. The permittivity of a medium ( $\epsilon$ , in F/m) determines its behavior when exposed to an electric field. The relative permittivity is the ratio between a medium's permittivity and that of a vacuum ( $\epsilon_r = \epsilon/\epsilon_0 = \epsilon' - i \epsilon''$ ; unitless; hereafter relative permittivity will stand for permittivity). Permittivity is characterized by a complex number, where the real part ( $\epsilon'$ ) describes the translation and rotation of molecular dipoles, which drives the wave propagation, and the imaginary part ( $\epsilon''$ ) describes the energy loss (absorption) associated with this process (Griffiths, 1999). The real and imaginary parts are linked through the Kramers–Kronig relations (Klingshirn, 2012), therefore they are not fully independent. A medium that strongly opposes the application of an external electric field displays a high permittivity (e.g.  $\epsilon'_{\text{water}} \approx 78\text{--}79$  in the 1–2 GHz frequency range; Pavlov and Baloshin, 2015) and a medium that does not strongly oppose an external electric field displays a low permittivity (e.g.  $\epsilon'_{\text{air}} \approx 1$ ).

Because of water's high permittivity, it dominates the microwave signal observed by satellite-based radiometers. Similarly, soil moisture retrieval algorithms exploit the high contrast in water-soil-air permittivity differences. However, the water phase also plays an important role in soil permittivity. When water freezes, the molecules become bound in a crystal lattice and the permittivity drops drastically compared to liquid water (i.e.  $\epsilon'_{\text{ice}} \approx 3$ ). The permittivity drop observable within freezing soils translates into a higher microwave emission from the ground. This allows for the retrieval of the ground state (freeze/thaw) from passive microwave observations (Zuerndorfer et al., 1990; Judge et al., 1997; Zhao et al., 2011; Rautiainen et al. 2012; Roy et al., 2015; Derksen et al, 2017). Soil permittivity is especially important in radiative transfer models since it acts as a boundary condition in the models. As microwave permittivity is challenging to measure in field settings, it is typically derived from empirical relationships and physical properties. Nonetheless, many uncertainties remain in the relationship between soil permittivity and soil physical parameters (Montpetit et al., 2018; Moradizadeh and Saradjian, 2016). This is especially evident during the winter when, in many cases, fixed values are introduced in data analysis algorithms due to a lack of better estimates or, in other cases, data are simply not available during winter. The difficulty in gathering *in situ*

75 permittivity data at microwave frequencies represents a major hindrance in the parameterization and  
validation of soil permittivity models, which induces high uncertainties in soil permittivity estimates. This is  
further complicated by the frequency dependence of permittivity.

Therefore, there is a need to collect better permittivity estimates for the validation of microwave observations  
80 and models. However, the majority of instruments deployed to validate microwave permittivity models, such  
as soil moisture sensors, use measurement frequencies (50–70 MHz) well outside the range of the concerned  
satellite observations (1400–1427 MHz). Until now, in the absence of a better alternative, the assumption  
that MHz and L-Band microwave soil permittivity are equivalent has been widely used to validate SMAP  
and SMOS algorithms (Roy et al., 2017a; Lemmetyinen et al., 2016), although this assumption was never  
85 rigorously tested. Furthermore, very few instruments used in field conditions continuously measure  
microwave permittivity in the frequency range of satellite sensors (Demontoux et al., 2019 and accepted). In  
addition, only a few laboratory studies have used L-Band permittivity measurements, and most of the  
available studies have focused on thawed soil samples (Bircher et al., 2016a and 2016b; Demontoux et al.,  
2017).

90 The goal of this laboratory-based study is to assess OECF L-band permittivity measurements in frozen soils  
and the implications of substituting them with permittivity estimates taken at lower frequency by: 1)  
evaluating the L-band permittivity of different types of soil in frozen and unfrozen conditions using an  
open-ended coaxial probe (OECF); 2) comparing the OECF measurements with those from a commercially  
95 available soil moisture probes operating at a lower frequency (i.e. the Stevens HydraProbe) to evaluate the  
potential of these lower cost probes to estimate L-Band permittivity, and; 3) comparing the soil permittivity  
measurements captured with both devices against that predicted from soil permittivity models currently  
used in L-band passive microwave retrieval algorithms. This paper is structured as follows: Section 2.1  
describes permittivity instruments used in this study; Section 2.2 gives an overview of two soil permittivity  
100 models used for satellite retrieval; Section 3 provides information on the study sites, data collection and  
laboratory setup. Lastly, in Sections 4 and 5, we compare and contrast the OECF measurements,  
commercial probe measurements and model simulations.

## 2 Theoretical background

### 2.1 Soil permittivity instruments

105 This study compares the permittivity estimates from two devices, an OECF and the Stevens HydraProbe, the  
following sections briefly describe these instruments.



### 2.1.1 Open-Ended Coaxial Probe (OECF)

An OECF was developed by the Université de Sherbrooke (UdeS) and Université du Québec à Trois-Rivières (UQTR) to monitor the permittivity at L-band frequencies of tree trunks (Mavrovic et al., 2018) and snow (Mavrovic et al., 2020) (Fig. 1a). The OECF acts as a coaxial waveguide, and the reflection coefficient at the interface of its open edge and the probed medium is measured by a reflectometer connected to the OECF. This reflectometer acts as both an electromagnetic wave generator and a reflection coefficient measuring instrument for frequencies from 1 to 2 GHz. The reflection coefficient (i.e. magnitude of the reflected and incident electric field ratio) depends on the permittivity of the probed medium. The permittivity is retrieved from the reflection coefficient using a specific calibration based on open (air), short (copper plate) and standard samples (saline solutions of known permittivity) (Filali et al., 2006 and 2008). The permittivity of a wide range of materials can be measured by the OECF as long as it is possible to ensure the probe's open edge makes contact with a flat and smooth surface. This probe has already been described in detail and calibrated on known permittivity surfaces (Mavrovic et al., 2018 and 2020). The sensing depth of the OECF is defined as the maximal depth at which a medium is polarized due to the incident electric field, and as such contributes to the electromagnetic wave reflection. The sensing depth is proportional to the medium's permittivity and the magnitude of the electric field generated by the reflectometer, which displays a constant power output of 10 dBm (Fig. 1b). The OECF typical sensing depth approaches 1 cm under dry soil conditions and the cylindrical probed volume is about 3.5 cm wide in diameter (Figure 2). Under wet soil conditions, the sensing depth shrinks down to 0.4 cm. Under wet soil conditions, the sensing depth shrinks down to 0.4 cm. The probe system is operational in remote environments since it is easily transportable, sensibly sized (low weight and small dimensions), energy efficient, weatherproof, and operates at low temperatures. The OECF integrates a permittivity measurement in less than a second and does not require destructive sampling, although the user must be careful to avoid air gaps between the probe and the soil. While tested on reference solids, the OECF display uncertainties under 3.3% for real permittivity and under 2.5% or 0.04 (whichever is greater) for imaginary permittivity (Mavrovic et al., 2018).

### 2.1.2 HydraProbe

The HydraProbe (HP) is a commercial soil moisture probe, from *Stevens Water Monitoring Systems, Inc.*, that uses coaxial impedance dielectric reflectometry to measure soil permittivity (HydraProbes Soil Sensor User Manual, 2018). A digital model of the HP using the SDI-12 protocol was employed. The probe consists of a cylindrical casing which houses the electronics as well as four stainless steel tines (0.3 cm in diameter, 5.7 cm long) that protrude from a metal base plate (4.2 cm diameter). Three tines are arranged in a circle 3.0 cm in diameter around a central tine. The HP operates at 50 MHz and probes a larger volume than the OECF, ranging between approximately 40 and 350 cm<sup>3</sup>. The HP soil complex permittivity computation is derived from the impedance measurements between the steel tines, which depends mainly on the liquid water content of the soil surrounding the tines (Kraft et al., 1988, Campbell et al., 1988 and 1990, Seyfried et al., 2004). Thus, the HP measures real and imaginary soil permittivities (uncertainties of  $\pm 0.2$  or  $\pm 1\%$ , whichever is greater) as well as temperature ( $\pm 0.3^\circ\text{C}$ ). From these two variables, soil moisture is estimated using an

empirical relationship calibrated for the given soil type (uncertainties between  $\pm 0.01$  and  $0.03$  volumetric water content depending on soil type), with individual calibrations resulting in slightly lower uncertainties (Seyfried et al., 2005; Burns et al., 2014; Rowlandson et al., 2013). This probe is widely used to measure soil moisture for meteorological and agricultural applications. It is deployed along several meteorological station networks (e.g Tetlock et al. 2019). Figure 2 illustrates typical probed volumes for the OECF (dry  $\sim 10 \text{ cm}^3$ , wet  $\sim 5 \text{ cm}^3$ ) and HP (dry  $\sim 40 \text{ cm}^3$ , wet  $\sim 350 \text{ cm}^3$ ) under dry and wet soil conditions.

## 2.2 Soil permittivity models

Two models commonly used in the remote sensing community for the retrieval of the soil freeze-thaw state were selected.

### 2.2.1 Zhang's Model

The model from Zhang et al. (2010) (henceforth Zhang's model) is a semi-empirical soil model for estimating microwave soil permittivity from soil physical characteristics. It is an extension of the semi-empirical mixing dielectric model (SMDM) adapted to frozen soils from Dobson et al. (1985). Zhang's model is based on dielectric mixing for soil/air/water mixture to estimate soil permittivity at microwave frequencies:

$$\epsilon^\alpha = f_s \epsilon_s^\alpha + f_a \epsilon_a^\alpha + f_{fw} \epsilon_{fw}^\alpha + f_{bw} \epsilon_{bw}^\alpha + f_i \epsilon_i^\alpha \quad (1)$$

where  $\epsilon$  is the permittivity of the overall soil mixture,  $\alpha$  a constant shape factor (optimized at  $0.65$  by Zhang et al., 2003),  $f$  the fraction of each component in the soil mixture and the subscripts  $s$ ,  $a$ ,  $i$ ,  $fw$  and  $bw$  refer respectively to solid soils, air, ice, free water and bound water. The approximation of combining free and bound water is made in the model to avoid evaluating the challenging bound water permittivity ( $\epsilon_w$ ). Also, air contribution to permittivity is negligible ( $\epsilon_a \approx 1$ ). Zhang's model evaluates the unfrozen water fraction ( $f_w$ ) in soil near the freezing point in order to obtain a continuous transition between the solid and liquid phases of water. An empirical exponential decay function ( $f_w = A \cdot |T_{soil}|^{-B}$ ) is used to estimate the liquid water vs. ice fractions in the freezing soils. The parameters  $A$  and  $B$  of the previous function were empirically estimated based on soil types (Zhang et al., 2003). Solving eq. 1 to obtain an expression for soil mixture permittivity from constant and measurable parameters, Zhang et al. (2010) obtained:

$$\epsilon^\alpha = 1 + \frac{\rho_b}{\rho_s} (\epsilon_s'^\alpha - 1) + f_w^\beta \epsilon_w^\alpha - f_w + f_i \epsilon_i^\alpha - f_i \quad (2)$$

where  $\rho_b$  represents soil bulk density,  $\rho_s$  soil specific density and  $\beta$  is a parameter that depends on soil composition. The input parameters required by Zhang's model to evaluate all variables in eq. 2 include frequency (set at  $1.4 \text{ GHz}$  for this study), soil moisture (main driver for soil permittivity), temperature, dry bulk density and composition (clay, silt and sand fractions) (Zhang et al., 2003 and 2010; Mironov, 2017).

### 2.2.2 Temperature Dependable Generalized Refractive Mixing Dielectric Model (TD GRMDM)

The TD GRMDM is a semi-empirical model that estimates the microwave permittivity of a soil from its physical properties using a mixing dielectric approach similar to Zhang's model (Mironov et al., 2010). The model accounts for the effect of soil granulometry, temperature and water liquid content through empirical relationships. This model allows for the distinction of bound and free water, giving each of these components a distinct dielectric spectrum. The computational implementation of the TD GRMDM used in this experiment was provided by members of the CESBIO team (Centre d'Etudes Spatiales de la Biosphère, Toulouse, France) that worked on the operational product of the SMOS mission which used TD GRMDM as one of its modelling components. The input parameters required in TD GRMDM are frequency (set at 1.4 GHz for this study), soil moisture, temperature, dry bulk density and clay fraction. Soil moisture is the main parameter driving soil permittivity. This model was built and validated on a soil database comprising the full range of textures covered by the SMOS mission (Mialon et al., 2015; Mironov et al., 2009 and 2010). However, with respect to the soil water freeze/thaw state, TD GRMDM is a binary model. All water in the soil is either thawed or frozen, therefore the freeze/thaw transition appears as a discontinuity. The model, however, allows for offsetting the freeze/thaw transition temperature to account for freezing point depression. TD GRMDM uses fixed values for frozen soils with no dependency on temperature, ice fraction or soil composition.

## 3 Data and methods

### 3.1 Methods

Two experiments were performed in this study, the first under fast freeze/thaw transition conditions (one-time air temperature adjustment), and the second under slow transition conditions with small progressive increases in air temperature.

#### 3.1.1 Fast freeze/thaw transition

Continuous permittivity measurements were conducted on mineral and organic soil samples going through two or three consecutive freeze/thaw cycles in a NorLake2 mini-room walk-in controlled temperature chamber (5.55 to 19.11 m<sup>3</sup> volume) equipped with a CP7L control panel at the School of Environmental Science of the University of Guelph (UofG). The soil samples were previously collected from their respective study sites (see Sect. 3.2) in PVC or plastic containers. The OBS sample was collected using a rectangular container, while the other samples were collected using cylindrical containers. The containers were placed in an insulated cardboard box (28x38x33 cm for a volume of 3.5x10<sup>4</sup> cm<sup>3</sup>) filled with sand to surround the soil samples (Fig. 3). This setup was intended to simulate the hot/cold front coming from the surface by isolating the sides and bottom of the soil samples. The OECP and HP were horizontally inserted into undisturbed soil and centered at a depth of 2.5 cm below the soil surface with sufficient spacing between the probes and the soil samples edges to ensure that the probed volumes are restricted to the limits of the soil samples (Fig. 3). Special care was deployed to ensure no air gap was found between the OECP and the undisturbed soil, but

without applying extra pressure on the probe. The Fig. 3a and 3b setup discrepancies only reflect the two distinct containers used for soil collection at different sites, both configurations ensured sufficient spacing for undisturbed measurements. For the organic soil samples, into which multiple probes were inserted, sufficient spacing ( $\sim 7.5$  cm with the OECF and  $> 1$  cm between the HP) between probes was ensured to avoid probe interaction. The OECF was calibrated (see Sect. 2.1.1) in the temperature-controlled chamber at  $+10^{\circ}\text{C}$ . The OECF can operate at a wide range of temperature and was tested to temperature down to  $-30^{\circ}\text{C}$  in the Canadian Arctic (Mavrovic et al., 2020). Beside the OECF, the Planar R54 reflectometer (Copper Mountain Technologies) generating and measuring the electromagnetic waves is graded for  $[-10 +50]^{\circ}\text{C}$  temperature range and the Pasternack coaxial cable joining the OECF and the reflectometer for  $[-50 +205]^{\circ}\text{C}$  temperature range. The OECF calibration displays a slight temperature dependency, where the calibration drift showed a 0.5% increase in permittivity when using a calibration at  $-15^{\circ}\text{C}$  compare to a calibration at  $10^{\circ}\text{C}$ . This calibration drift is small compared to the measurement uncertainties ( $\pm 3.3\%$  for real permittivity and  $\pm 2.5\%$  for imaginary permittivity; Mavrovic et al., 2018).

HP output signals were logged with a CR800 datalogger (Campbell Scientific, Inc.). Unlike the HP, the OECF does not record temperature. Therefore, a Campbell Scientific temperature probe (model 107) was placed next to the OECF to measure soil temperature. The air temperature of the cold chamber was set at  $+10^{\circ}\text{C}$  for thawing cycles (initial air temperature of  $-10^{\circ}\text{C}$ ) and  $-10^{\circ}\text{C}$  for freezing cycles (initial air temperature of  $+10^{\circ}\text{C}$ ). These experimental conditions allowed for a complete freeze/thaw cycle in approximately 24 hours and were chosen for practical considerations. However, it should be acknowledged that these conditions represent a relatively rapid transition. Permittivity and temperature measurements were set at one-minute intervals for all instruments.

### 3.1.2 Slow freeze/thaw transition

To investigate the effect of a slower freeze/thaw transition on the temperature amplitude of the hysteresis effect, another experimental setup was created in a Climats EXCAL 1411-HE cold chamber ( $0.138\text{ m}^3$  volume) at the Laboratoire de l'Intégration du Matériau au Système (Bordeaux, France). Since the soil sample and the Polytetrafluoroethylene (i.e. PTFE or TEFLON) container had smaller volumes, the OECF probe was installed on top of the soil sample with its open end in contact with the soil (Fig. 4). Only OECF permittivity measurements were taken in this experiment since an HP sensor was not available. The objective of this experimental setup was to experiment a slow freeze/thaw transition. Measurements were made to cover a soil temperature range from  $-20^{\circ}\text{C}$  to  $+11.5^{\circ}\text{C}$  with a variable soil temperature measurement interval to have a finer curve resolution around freezing point. Permittivity measurements were taken only when the soil temperature equilibrated with the cold chamber air temperature ( $\pm 0.1^{\circ}\text{C}$ ). This method was significantly more time-consuming than the fast transition setup, as a full cycle took several days and required heavy user surveillance.

### 3.2 Studied soil types

Studied soil samples were collected from four different sites and consisted of a single homogenous soil layer (Table 1). Care was taken during transportation to the cold chamber to preserve their original state and leave their structure and moisture content as undisturbed as possible.

The first site was located in the boreal forest at the Old Black Spruce Research Station (OBS). This research facility is in northern Saskatchewan near Canada's boreal forest southern limit and is part of the Boreal Ecosystem Research and Monitoring Sites (BERMS). Its soil is rich in organic matter, displays high soil moisture levels for most of the thawed season (Gower et al., 1997), and is further described in Roy et al. (2020). The samples were collected January 27<sup>th</sup>, 2018.

The remaining sites were all in agricultural fields with mineral soils in southern Ontario, Canada. Soil samples were collected at the University of Guelph's Elora Research Station (sandy loam; collected late fall 2017) as well as on private farms in Cambridge (loamy sand; collected late fall 2017) and Dunnville (clay loam; collected mid-winter 2018). The soils were selected to be representative of a range of soil textures and complement existing research at the three locations. These samples and their collection process are further described in Pardo Lara et al. (2020) and the data are available at the Federated Research Data Repository through the Polar Data Catalog of metadata (PDC; <https://dx.doi.org/10.20383/101.0200>).

The soil composition and liquid water content of each sample were analyzed (Table 1). A particle size analysis of the OBS sample was completed at the UdeS using a soil sifting approach to determine the sand fractions and a densitometry technique based on Stokes law (Mériaux, 1953 and 1954) for the clay and silt fractions. The particle sizes of the Dunville, Elora and Cambridge samples were all measured using the hydrometer method (Bouyoucos, 1962). Liquid water content was measured using the drying and weighting technique for all soil samples (O'Kelly, 2004).

## 4 Results

### 4.1 Experimental results

Figures 5 to 8 show the complex permittivity of the four soil samples when undergoing consecutive fast freeze/thaw cycles. Of note, the freeze/thaw transitions were reproducible between cycles using both HP and OECF sensors. The repeatability of the OECF measurements can also be seen as an indicator of the reliability of the measurements. Both thawed soil permittivity from the OECF ( $\epsilon'_{\text{thawed}} = [6.5; 22.8]$ ,  $\epsilon''_{\text{thawed}} = [1.43; 5.7]$ ) and HP ( $\epsilon'_{\text{thawed}} = [6.2; 21.7]$ ,  $\epsilon''_{\text{thawed}} = [1.7; 10.0]$ ) in Table 2 show a strong correlation between permittivity measurement and volumetric liquid water content as expected. For frozen soils (Table 3), the OECF ( $\epsilon'_{\text{frozen}} = [3.5; 6.0]$ ,  $\epsilon''_{\text{frozen}} = [0.46; 1.2]$ ) and HP ( $\epsilon'_{\text{frozen}} = [2.4; 7.0]$ ,  $\epsilon''_{\text{frozen}} = [0.47; 2.8]$ ) permittivity measurements do not seem to display any direct relationship with ice fraction or dry bulk density. Hysteresis effects can be

observed between the freezing and thawing cycles in Figs. 5 through 8, i.e. a different behavior of permittivity variation depending on whether the ground freezes or thaws. Although hysteresis is reported in soil freezing studies, this effect was amplified by the temperature transition speed and differences in the sensing volume for temperature and permittivity observations (Pardo Lara et al., 2020). Fig. 11 shows a slow freeze/thaw transition displaying a hysteresis effect of diminished amplitude, but still noticeable. The explanation of the freeze/thaw hysteresis effect is further discussed in sect. 5 to highlight the respective impact of the temperature transition speed and the sensing volume of the temperature measurements versus the permittivity measurements. The HP measurements show trends in agreement with that of the OECF measurements during freeze/thaw transitions, especially for the real permittivity, although the fully frozen and thawed permittivity values display soil type dependent offsets between the OECF and HP measurements (Tables 2 and 3). The OECF and HP permittivity measurements, compared in the scatterplot of Fig. 9, are similar for the real part (RMSE = 1.03) but show larger discrepancies for the imaginary part (RMSE = 1.82). Across soil types, no systematic bias between OECF and HP real permittivity were observed, although HP imaginary permittivity measurements tend to be systematically higher than OECF measurements, with the trend being more pronounced at higher imaginary permittivity (i.e. at higher liquid water content). It was expected that the OECF measured imaginary permittivity would be lower than that of the HP because the dielectric loss due to liquid water is more pronounced at L-band (OECF) than in the MHz frequencies (Mätzler, 1987; Artemov and Volkov, 2014).

In most experiments presented, a short surge in permittivity can be observed right after thawing, followed by a small drop leading to a convergence to a relatively stable permittivity value associated with a fully thawed soil. Further investigation is needed to see if this short surge could be related to moisture migration toward the thawing front and to water percolation through the soil sample toward the end of the thawing transition. It can also be observed that the freeze/thaw transition measurements are steeper with the OECF than the HP. This is probably due to the HP's larger probed volume. Since the instruments measure an average permittivity for the whole probed volume, the larger probed volume of the HP records an extended freeze/thaw transition because of the longer time required for the freezing/thawing fronts to penetrate the depth of volume probed. Since the freezing/thawing front is mostly vertically oriented, it is the difference in probes' sensing diameter that causes the difference in transition steepness.

## 4.2 Model Results

Soil parameters from Table 1 were used to drive the TD GRMDM and Zhang's model. Output from the models is shown in Figs. 5 to 9 and summarized in Tables 2 and 3. There are important discrepancies between the data and the models. The TD GRMDM does not simulate the freeze/thaw transition, resulting in a discontinuity in soil permittivity at the freezing point. Zhang's model estimates the ice fraction for a given sub-freezing temperature, displaying a continuous freeze/thaw transition. Even if amplified by the experimental setup, the hysteresis effect between the freezing and thawing cycles is not simulated by any

model since they do not include the evolution of soil properties in time. The divergence between models and data is more prevalent for the imaginary part of the permittivity than for the real part. Zhang's model seems to systematically underestimate frozen soil permittivity, while the TD GRMDM fixed value approach is closer to the measured permittivity although it does not account, when the soil is frozen, for soil composition or ice content. Lastly, both models overestimated the soil permittivity of thawed samples with high water content according to the results of this study (Fig. 5), which agrees with results from Bircher et al. (2016b). Further investigation would be required to identify the sources of permittivity overestimation in the models, although it is probable that it comes from the difficulty in uncoupled free and bound water in soil permittivity models. The movement of a fraction of water molecules under the soil surface is hindered by solid soil particles. Those constrained water molecules are described as bound water. Since their ability to align with an electrical field is reduced, the permittivity of bound water is reduced as well (Jones et al., 2002).

## 5 Discussion

The temperature dependence trend of permittivity during freeze/thaw transitions was similar across almost all OECF and HP measurements. The main difference between the permittivity measured at microwave and MHz frequencies appears to be an offset dependent on the soil type. Therefore, based on the offsets seen in Tables 2 and 3 and Fig. 9, a calibration equation between L-band and MHz permittivity can be obtained for a given soil. This would allow for the use of low-cost and widespread instrumentation in the MHz spectrum, such as the HP, to act as surrogate L-band soil permittivity measurements. This opens up the possibility of studies over large areas through already deployed networks. It should be remembered that MHz permittivity measurements have already been used to test SMAP and SMOS algorithm's permittivity under the assumption that the MHz and L-band permittivity are equivalent (Roy et al., 2017a; Lemmetyinen et al., 2016). As our results showed, MHz and L-band soil permittivity trends are close to each other but not identical, therefore the previous assumption must be reconsidered because neglecting the frequency dependence of soil permittivity induces a bias in the results.

Ground and satellite-based L-band radiometric measurements are very sensitive to the freezing of the first centimeter of soil (Rowlandson et al., 2018; Roy et al., 2017a, b; Williamson et al., 2018). Therefore, the shallower depth ( $\sim 0.4\text{--}1$  cm) and smaller volume ( $\sim 4\text{--}10$  cm<sup>3</sup>) probed by the OECF makes it a potentially more suitable instrument to study the freeze/thaw signal observed from L-band radiometers.

The hysteresis effect observed in Figs. 5 to 8 was likely amplified by the experimental setup because of the fast temperature transition speed used. Nonetheless, the hysteresis effect is expected to occur because of the asymmetry between the freezing and thawing processes. The classic Zhang's model only takes into account ice fraction below 0°C, this ice fraction should not be interpreted as actual ice at temperature below freezing point but rather as an aggregate of the heterogeneous soil temperature. Figure 10 demonstrates the hysteresis effect simulated by using a modified version of Zhang's model that considers ice fraction above and below



0°C. This ice fraction was prescribed following an exponential function ( $\frac{e^x}{e^x+1}$ ) around the freezing point. For  
360 a proper estimation of ice fraction in soil, the evolution of the soil and boundary conditions should be  
simulated using more complex models like CLASSIC (Melton et al., 2020).

We further tested the hypothesis that the hysteresis effect is correlated with the temperature transition speed  
using an OBS soil sample using a slower freeze/thaw transition rate. The hysteresis effect displayed in Fig.  
11 is still noticeable (< 1°C offset from freezing point) but not as pronounced as in Figs. 5 to 8 (between 2°C  
365 and 3°C offset from freezing point). Since the soil permittivity has an important impact on brightness  
temperature as observed by satellite-based radiometers (Roy et al., 2017a and 2017b; Jonard et al., 2018;  
Prince et al., 2019;), it is notable that this hysteresis effect around freezing point is not taken into account in  
current soil models used in microwave satellite retrieval algorithms. The omission of this effect may  
potentially have an impact on freeze/thaw detection products and their validation. It should be noted that this  
370 hysteresis effect is not always observed for *in situ* data due to the instrumental uncertainty not being precise  
enough to conclusively separate the hysteresis effect *in situ* (e.g. Pardo Lara et al., 2020). The effect might  
also be mitigated at the pixel scale of modern satellites because of spatial heterogeneity (Roy et al. 2017b).

Based on our simulations, ice fraction representation in Zhang's model results in a more physically  
375 appropriate representation of processes around the freezing point and results in freeze/thaw transitions closer  
to observations. It should be noted that an ice fraction could be implemented in TD GRMDM as well. To  
reproduce the hysteresis effect at freeze/thaw transition, two approaches are possible. An empirical approach  
could be used by implementing a double threshold using distinct ice fraction empirical relationships for 1)  
the freezing and 2) the thawing cycle. This empirical approach would require determining the  
380 freezing/thawing temperature offset independently for each transition type which would depend on liquid  
water content, textural composition, solute concentration, and the pore pressure of the soil (Daanen et al.,  
2011). The alternative would be to couple dielectric models with soil physical models that integrate the time  
evolution of soil physical properties (e.g. CLASSIC model; Melton et al., 2020). Soil physical models provide  
an estimate of the ice fraction through time, which is used by dielectric models to estimate soil permittivity.  
385 Such coupling should only impact the freeze/thaw transition where ice fraction is a relevant parameter.

## 6 Conclusion

This study presents soil microwave permittivity measurements during freeze/thaw transitions in the same  
frequency range as the SMAP and SMOS satellites, as well as future L-band satellite missions. The  
permittivity measurements were taken using a novel open-ended coaxial probe (OECF). It is shown that  
390 lower frequency (MHz) soil permittivity probes can be used to estimate microwave permittivity given proper  
calibration relative to an L-band probe, which holds significant potential considering the already widespread  
operational networks of low frequency soil permittivity probes deployed to measure soil moisture. This study

also highlighted the need to improve dielectric soil models, particularly during freeze/thaw transitions. We observed noticeable discrepancies between *in situ* data and model estimates, and no current model accounts for the hysteresis effect shown between freezing and thawing processes. Although this phenomenon should be considered as an aggregate of soil temperature heterogeneity rather than actual conditions, it is of relevant interest to study and understand it for all macroscopic to satellite scale applications. Few studies have investigated this hysteresis effect, which could have a significant impact on freeze/thaw detection from satellites. Future work will look to improve soil thermal regime retrieval near the freezing point using permittivity measurements, which is impactful on the evaluation of the carbon budgets of northern regions.

## 7 Acknowledgments

This work was made possible thanks to the contributions of the Canadian Space Agency (CSA), Natural Sciences and Engineering Research Council of Canada (NSERC), Canada Foundation for Innovation (CFI). The experiments in Bordeaux were supported by the Samuel-De-Champlain France-Québec collaborative project (Fonds québécois de la recherche sur la nature et les technologies, FQRNT). We would also like to thank Bilal Filali, PhD, for his contribution to the design and manufacture of the probe, along with Simone Bircher, Arnaud Mialon, Yann Kerr and the entire CESBIO team in Toulouse for their contributions to probe testing and collaboration with Bordeaux laboratory. A special thanks to Jean-Pierre Wigneron from INRA for providing the codes to run the TD GRMDM model.

## 8 Competing interests

The authors declare that they have no conflict of interest.

## 9 Data availability

The research data can be accessed by direct request to the author.

## References

- Artemov, V., and Volkov, A.: Water and Ice Dielectric Spectra Scaling at 0°C, *Ferroelectr.*, 466, 158–165, doi:10.1080/00150193.2014.895216, 2014.
- Attema, E., and Ulaby, F.: Vegetation modeled as a water cloud. *Radio Sci.*, 13(2), 357-364, doi:10.1029/RS013i002p00357, 1978.
- Bircher, S., Anreassen, M., Vuollet, J., Vehviläinen, J., Raitiainen, K., Jonard, F., Weihermüller, L., Zakharova, E., Wigneron, J.-P., and Kerr, Y.: Soil moisture sensor calibration for organic soil surface layers, *Geosci. Instrum. Methods Data Syst.*, 5, 109–125, doi:10.5194/gi-5-109-2016, 2016a.
- Bircher, S., Demontoux, F., Razafindratsima, S., Bircher, S., Zakharova, E., Drusch, M., Wigneron, J.-P., and Kerr, Y.: L-Band Relative Permittivity of Organic Soil Surface Layers—A New Dataset of Resonant Cavity Measurements and Model Evaluation, *Remote Sens.*, 8, 1024, doi:10.3390/rs8121024, 2016b.

- Bracaglia, M., Ferrazzoli, P., and Guerriero, L.: A fully polarimetric multiple scattering model for crops, *Remote Sens. of Environ.*, 54(3), 170–179, doi:10.1016/0034-4257(95)00151-4, 1995.
- Burns, T., Adams, J., and Berg, A.: Laboratory Calibration Procedures of the Hydra Probe Soil Moisture Sensor: Infiltration Wet-Up vs. Dry-Down, *Vadose Zone J.*, 13(12), 1–10, doi:10.2136/vzj2014.07.0081, 2014.
- Bouyoucos, G.: Hydrometer method improved for making particle size analysis of soils, *Agron. J.*, 54(5), 464–465, doi:10.2134/agronj1962.00021962005400050028x, 1962.
- Campbell, J.: Dielectric Properties and Influence of Conductivity in Soils at One to Fifty Megahertz, *Soil Sci. Soc. Am. J.*, 54(2), 332–341, doi:10.2136/sssaj1990.03615995005400020006x, 1990.
- Colliander, A., Jackson, T., Bindlish, R., Chan, S., Das, N., Kim, S., Cosh, M., Dunbar, R., Dang, L., Pashaian, L., Asanuma, J., Aida, K., Berg, A., Rowlandson, T., Bosch, D., Caldwell, T., Caylor, K., Goodrich, D., al Jassar, H., Lopez-Baeza, E., Martínez Fernández, J., González-Zamora, A., Livingston, S., McNairn, H., Pacheco, A., Moghaddam, M., Montzka, C., Notarnicola, C., Niedrist, G., Pellarin, T., Prueger, J., Pulliainen, J., Rautiainen, K., Ramos, J., Seyfried, M., Starks, P., Su, Z., Zeng, Y., van der Velde, R., Thibeault, M., Dorigo, W., Vreugdenhil, M., Walker, J. P., Wu, X., Monerris, A., O'Neill, P. E., Entekhabi, D., Njoku, E.G., and Yueha, S.: Validation of SMAP surface soil moisture products with core validation sites, *Remote Sens. Environ.*, 191, 215–231, doi:10.1016/j.rse.2017.01.021, 2017.
- Daanen, R., Misra, D., and Thompson, A.: Frozen Soil Hydrology. *Encyclopedia of Snow, Ice and Glaciers*, edited by: Singh, V., Singh, P., and Haritashya, U., Springer Netherlands, 306–11, ISBN:978-90-481-2641-5, 2011.
- Demontoux, F., Razafindratsima, S., Bircher, S., Ruffié, G., Bonnaudin, F., Jonard, F., Wigneron, J.-P., Sbartaï, M., and Kerr, Y.: Efficiency of end effect probes for in-situ permittivity measurements in the 0.5–6 GHz frequency range and their application for organic soil horizons study, *Sens. Actuators, A: Physical*, 254, 78–88, doi:10.1016/j.sna.2016.12.005, 2017.
- Demontoux, F., Tsague King, J., Bircher, S., Ruffie, G., Bonnaudin, F., Wigneron, J.-P., and Kerr, Y.: In-situ multi-frequency dielectric measurements to improve soil permittivity models for radiometric observations of soil in the high latitudes, *Microrad 2020, Florence (Italy)*, Accepted.
- Demontoux, F., Yaakoubi, G., Wigneron, G., Grzeskowiak, M., Sbartaï, M., Fadel, L., Ruffié, G., Bonnaudin, F., Oyhenart, L., Vignéras, V., Wigneron, J.-P., Villard, L., Le Toan, T., and Kerr, Y.: Antipodal Vivaldi antennas dedicated to in-situ broadband microwave permittivity measurements, 2019 European Microwave Conference in Central Europe (EuMCE), Prague (CzechRepublic), 62–65, <https://prodinra.inra.fr/record/495910>, 2019.
- Derksen, C., Xu, X., Scott Dunbar, R., Colliander, A., Kim, Y., Kimball, J. S., Black, T. A., Euskirchen, E., Langlois, A., Loranty, M. M., Marsh, P., Rautiainen, K., Roy, A., Royer, A., and Stephens, J.: Retrieving landscape freeze/thaw state from Soil Moisture Active Passive (SMAP) radar and radiometer measurements, *Remote Sens. Environ.*, 194, 48–62, doi:10.1016/j.rse.2017.03.007, 2017.
- Dobson, M., Ulaby, F., Hallikainen, M., and El-Rayes, M.: Microwave dielectric behavior of wet soil - Part II: Dielectric mixing models, *Geosci. Model Dev.*, GE-23, 35–46, doi:10.1109/TGRS.1985.289498, 1985.
- Entekhabi, D., Njoku, E., O'Neill, P., Kellogg, K., Crow, W., Edelstein, W., Entin, J., Goodman, S., Jackson, T., Jackson, J., Kimball, J., Piepmeier, J., Koster, R., Martin, N., McDonald, K., Moghaddam, M., Moran, S., Reichle, R., Shi, J., Spencer, M., Thurman, S., Tsang, L., and Van Zyl, J.: The Soil Moisture Active Passive (SMAP) mission, *Proc. of the IEEE*, 98, 704–716, doi:10.1109/JPROC.2010.2043918, 2010.

- 485 Fan, L., Wigneron, J.-P., Mialon, A., Rodriguez-Fernandez, N.J., Ai-Yaari, A., Kerr, Y., Brandt, M., and Ciais, P.: SMOS-IC Vegetation Optical Depth Index in Monitoring Aboveground Carbon Changes in the Tropical Continents During 2010–2016, *IGARSS 2018 - 2018 IEEE International Geoscience and Remote Sensing Symposium*, Valencia (Spain), 2825–2828, doi:10.1109/igarss.2018.8518750, 2018.
- 490 Filali, B., Boone, F., Rhazi, J.-E., Ballivy, G.: Design and calibration of a large open-ended coaxial probe for the measurement of the dielectric properties of concrete, *IEEE Trans. Microwave Theory Tech.*, 56, 2322–2328, doi:10.1109/TMTT.2008.2003520, 2008.
- 495 Filali, B., Rhazi, J.-E., and Ballivy, G.: Measurement of the dielectric properties of concrete by a large coaxial probe with open end, *Can. J. Phys.*, 84, 365–379, doi:10.1139/p06-056, 2006.
- Gower S., Vogel, J., Norman, J., Kucharik, C., Steele, S., Stow, T.: Carbon distribution and aboveground net primary production in aspen, jack pine, and black spruce stands in Saskatchewan and Manitoba, Canada, *J. Geophys. Res.*, 102(D24), 29029–29041, doi:10.1029/97JD02317, 1997.
- 500 Griffiths, Introduction to electrodynamics - Third Edition, Pearson, Upper Saddle River, New Jersey, 576 pp., ISBN: 978-0138053260, 1999.
- 505 Huang, J., Tsang, L., Njoku, E., Colliander, A., Liao, T., and Ding, K.: Propagation and Scattering by a Layer of Randomly Distributed Dielectric Cylinders Using Monte Carlo Simulations of 3D Maxwell Equations With Applications in Microwave Interactions With Vegetation, *IEEE Access*, 5, 11985–12003, doi:10.1109/ACCESS.2017.2714620, 2017.
- 510 HydraProbe Soil Sensor Manual, Revision VI, Stevens Water Monitoring Systems Inc., Portland, Oregon, United-States, 63 pp., 2018.
- 515 Jonard, F., Bircher, S., Demontoux, F., Weihermüller, L., Razafindratsima, S., Wigneron, J.-P., and Vereecken, H.: Passive L-Band Microwave Remote Sensing of Organic Soil Surface Layers: A Tower-Based Experiment, *Remote Sens.*, 10(2), 304, doi:10.3390/rs10020304, 2018.
- Jones, S., Wraith, J., and Or, D.: Time domain reflectometry measurement principles and applications, *Hydrol. Process.*, 16(1), 141–153, doi: 10.1002/hyp.513, 2002.
- 520 Judge, J., Galantowicz, J., England, A., and Dahl, P.: Freeze/thaw classification for prairie soils using SSM/I radiobrightnesses, *IEEE Trans. Geosci. Remote Sens.*, 35(4), 827–832, doi:10.1109/36.602525, 1997.
- 525 Kerr, Y., Waldteufel, P., Richaume, P., Wigneron, J., Ferrazzoli, P., Mahmoodi, A., Al Bitar, A., Cabot, F., Gruhier, C., Juglea, S., Leroux, D., Mialon, A., and Delwart, S.: The SMOS soil moisture retrieval algorithm, *IEEE Trans. Geosci. Remote Sens.*, 50, 1384–1403, doi:10.1109/TGRS.2012.2184548, 2012.
- 530 Kerr, Y. H., Waldteufel, P., Wigneron, J. P., Delwart, S., Cabot, F. O., Boutin, J., Escorihuela, M. J., Font, J., Reul, N., Gruhier, C., and Juglea, S. E.: The SMOS mission: New tool for monitoring key elements of the global water cycle, *IEEE Trans. Geosci. Remote Sens.*, 98, 666–687, doi:10.1109/JPROC.2010.2043032, 2010.
- 535 Kim, Y., Kimball, K., Zhang, K., and McDonald, K.: Satellite detection of increasing northern hemisphere non-frozen seasons from 1979 to 2008: implications for regional vegetation growth, *Remote Sens. Environ.*, 121, 472–487, doi:10.1016/j.rse.2012.02.014, 2012.
- Klingshirn, C. F.: *Semiconductor Optics – Graduate Texts in Physics* (Chapter: Kramers–Kronig Relations), Springer, Berlin, Heidelberg, 849 pp., doi: 10.1007/b138175, 2012.

- 540 Lemmetyinen, J., Schwank, M., Rautiainen, K., Kontu, A., Parkkinen, T., Mätzler, C., Wiesmann, A.,  
Wegmüller, U., Derksen, C., Toose, P., Roy, A., and Pulliainen, J.: Snow density and ground permittivity  
retrieved from L-band radiometry: Application to experimental data, *Remote Sens. Environ.*, 180, 377-391,  
doi:10.1016/j.rse.2016.02.002, 2016.
- 545 Le Vine, D. M., Lagerloef, G. S., and Torrusio, S.: Aquarius and remote sensing of sea surface salinity  
from space, *Proc. IEEE*, 98, 688–703, doi:10.1109/JPROC.2010.2040550, 2010.
- 550 Mialon, A., Richaume, P., Leroux, D., Bircher, S., Bitar, A.A., Pellarin, T., Wigneron, J., and Kerr, Y.:  
Comparison of Dobson and Mironov Dielectric Models in the SMOS Soil Moisture Retrieval Algorithm,  
*IEEE Trans. Geosci. Remote Sens.*, 53(6), 3084–3094, doi:10.1109/TGRS.2014.2368585, 2015.
- Mätzler, C.: Applications of the interaction of microwaves with the natural snow cover, *Remote Sens. Rev.*,  
2, 259–387, doi:10.1080/02757258709532086, 1987.
- 555 Mavrovic, A., Madore, J.-B., Langlois, A., Royer, A., and Roy, A.: Snow liquid water content  
measurement using an open-ended coaxial probe (OECF), *Cold Reg. Sci. Technol.*, 171, 102958,  
doi:10.1016/j.coldregions.2019.102958, 2020.
- 560 Mavrovic, A., Roy, A., Royer, A., Filali, B., Boone, F., Pappas, C., Sonnentag, O.: Dielectric  
characterization of vegetation at L band using an open-ended coaxial probe, *Geosci. Instrum. Methods Data  
Syst.*, 7, 195–208, doi:10.5194/gi-7-195-2018, 2018.
- 565 Melton, J., Arora, V., Wisernig-Cojoc, E., Seiler, C., Fortier, M., Chan, E., and Teckentrup, L.: CLASSIC  
v1.0: the open-source community successor to the Canadian Land Surface Scheme (CLASS) and the  
Canadian Terrestrial Ecosystem Model (CTEM) – Part 1: Model framework and site-level performance,  
*Geosci. Model Dev.*, 13(6), 2825–2850, doi:10.5194/gmd-13-2825-2020, 2020.
- 570 Mériaux, S.: Contribution à l'étude de l'analyse granulométrique, Thèses présentées à la faculté des  
sciences de l'université de Paris, Institut national de recherche agronomique, Paris (France), Série A,  
590(614), 117 pp., 1953.
- Mériaux, S.: Contribution à l'étude de l'analyse granulométrique, *Ann. Agron.*, 5(I) 5–53 and 5(II) 149–  
205, 1954.
- 575 Mialon, A., Richaume, P., Leroux, D., Bircher, S., Bitar, A., Pellarin, T., Wigneron, J.-P., and Kerr, Y.:  
Comparison of Dobson and Mironov Dielectric Models in the SMOS Soil Moisture Retrieval Algorithm,  
*IEEE Trans. Geosci. Remote Sens.*, 53(6), 3084–3094, doi:10.1109/TGRS.2014.2368585, 2015.
- 580 Mironov, V., De Roo, R., and Savin, I.: Temperature-Dependable Microwave Dielectric Model for an  
Arctic Soil, *IEEE Trans. Geosci. Remote Sens.*, 48(6), 585–589, doi:10.1109/TGRS.2010.2040034, 2010.
- Mironov, V., Kosolapova, L., and Fomin, S.: Physically and Mineralogically Based Spectroscopic  
Dielectric Model for Moist Soils, *IEEE Trans. Geosci. Remote Sens.*, 47(7), 2059–2070,  
doi:10.1109/TGRS.2008.2011631, 2009.
- 585 Mironov, V., Kosolapova, L., Lukina, Y., Karavayskya, A., and Molostovb, I.: Temperature and texture-  
dependent dielectric model for frozen and thawed mineral soils at a frequency of 1.4 GHz, *Remote Sens.  
Environ.*, 200, 240-249, doi:10.1016/j.rse.2017.08.007, 2017.
- 590 Mo, T., Choudhury, B., Schmugge, T., Wang, J., and Jackson, T.: A model for microwave emission from  
vegetation-covered fields, *J. Geophys. Res.*, 87, 11229–11237, doi:10.1029/JC087iC13p11229, 1982.
- Montpetit, B., Royer, A., Roy, A., and Langlois, A.: In-situ passive microwave emission model  
parameterization of sub-arctic frozen organic soils, *Remote Sens. Environ.*, 205, 112-118,  
doi:10.1016/j.rse.2017.10.033, 2018.

595

Moradizadeh, M., and Saradjian, M.: The effect of roughness in simultaneously retrieval of land surface parameters. *Phys. Chem. Earth, Parts A/B/C*, 94, 127–135. doi:10.1016/j.pce.2016.03.006, 2016.

600

O’Kelly, B.: Accurate Determination of Moisture Content of Organic Soils Using the Oven Drying Method, *Drying Technol.*, 22(7), 1767–1776, doi:10.1081/DRT-200025642, 2004.

605

Pavlov, N., and Baloshin, Y.: Electromagnetic properties of water on GHz frequencies for medicine tasks and metamaterial applications, *J. Phys. Conf. Ser.*, 643, 012047, doi:10.1088/1742-6596/643/1/012047, 2015.

Pardo Lara, R., Berg, A., Warland, J., and Tetlock, E.: In Situ Estimates of Freezing/Melting Point Depression in Agricultural Soils Using Permittivity and Temperature Measurements, *Water Resour. Res.*, 56(5), e2019WR026020, doi:10.1029/2019WR026020, 2020.

610

Prince, M., Roy, A., Royer, A., and Langlois, A.: Timing and spatial variability of fall soil freezing in boreal forest and its effect on SMAP L-band radiometer measurements, *Remote Sens. Environ.*, 231, 111230, doi:10.1016/j.rse.2019.111230, 2019.

615

Rautiainen, K., Parkkinen, T., Lemmetyinen, J., Schwank, M., Wiesmann, A., Ikonen, J., Derksen, C., Davydov, S., Davydova, A., Boike, J., and Langer, M.: SMOS prototype algorithm for detecting autumn soil freezing, *Remote Sens. Environ.*, 180, 346–360, doi:10.1016/j.rse.2016.01.012, 2016.

620

Rodríguez-Fernández, N. J., Mialon, A., Mermoz, S., Bouvet, A., Richaume, P., Al Bitar, A., Al-Yaari, A., Brandt, M., Kaminski, T., Le Toan, T., Kerr, Y. H., and Wigneron, J.-P.: An evaluation of SMOS L-band vegetation optical depth (L-VOD) data sets: high sensitivity of L-VOD to above-ground biomass in Africa, *Biogeosciences*, 15, 4627–4645, doi:10.5194/bg-15-4627-2018, 2018.

625

Rowlandson, T., Berg, A., Bullock, P., Ojo, E. R., McNairn, H., Wiseman, G., and Cosh, M.: Evaluation of several calibration procedures for a portable soil moisture sensor, *J. Hydrol.*, 498, 335–344, doi:10.1016/j.jhydrol.2013.05.021, 2013.

630

Rowlandson, T., Berg, A., Roy, A., Kim, E., Pardo Lara, R., Powers, J., Lewis, K., Houser, P., McDonald, K., Toose, P., Wu, A., De Marco, E., Derksen, C., Entin, J., Colliander, A., Xu, X., and Mavrovic, A.: Capturing agricultural soil freeze/thaw state through remote sensing and ground observations: A soil freeze/thaw validation campaign, *Remote Sens. Environ.*, 211, 59–70, doi:10.1016/j.rse.2018.04.003, 2018.

635

Roy, A., Royer, A., Derksen, C., Brucker, L., Langlois, A., Mialon, A., and Kerr, Y. H.: Evaluation of Spaceborne L-Band Radiometer Measurements for Terrestrial Freeze/Thaw Retrievals in Canada, *IEEE J. Sel. Top. Appl. Earth Obs. Remote Sens.*, 8, 4442–4459, doi:10.1016/j.rse.2019.111542, 2015.

640

Roy, A., Toose, P., Williamson, M., Rowlandson, T., Derksen, C., Royer, A., Berg, A., Lemmetyinen, J., and Arnold, L.: Response of L-Band brightness temperatures to freeze/thaw and snow dynamics in a prairie environment from ground-based radiometer measurements, *Remote Sens. Environ.*, 191, 67–80, doi:10.1016/j.rse.2017.01.017, 2017a.

Roy, A., Toose, P., Derksen, C., Rowlandson, T., Berg, A., Lemmetyinen, J., Royer, A., Tetlock, E., Helgason, W., and Sonnentag, O.: Spatial Variability of L-Band Brightness Temperature during Freeze/Thaw Events over a Prairie Environment, *Remote Sens.*, 9, 894, doi:10.3390/rs9090894, 2017b

645

Roy, A., Leduc-Leballeur, M., Picard, G., Royer, A., Toose, P., Derksen, C., Lemmetyinen, J., Berg, A., Rowlandson, T., and Schwank, M.: Modelling the L-band snow-covered surface emission in a winter Canadian prairie environment, *Remote Sens.*, 10, 1451, doi:10.3390/rs10091451, 2018.

650

Roy, A.R., Toose, P., Mavrovic, A., Pappas, C., Royer, A., Derksen, C., Berg, A., Rowlandson, T., El-Amine, M., Barr, A., Black, A., Langlois, A., and Sonnentag, O.: L-Band response to freeze/thaw in a

- boreal forest stand from ground- and tower-based radiometer observations, *Remote Sens. Environ.*, 273, 111542, doi:10.1016/j.rse.2019.111542, 2020.
- 655 Seyfried, M., and Murdock, M.: Measurement of Soil Water Content with a 50-MHz Soil Dielectric Sensor, *Soil Sci. Soc. Am. J.*, 68(2), 394–403, doi:10.2136/sssaj2004.3940, 2004.
- Seyfried, M., Grant, L., Du, E., and Humes, K.: Dielectric Loss and Calibration of the Hydra Probe Soil Water Sensor, *Vadose Zone J.*, 4(4), 1070, doi:10.2136/vzj2004.0148, 2005.
- 660 Tetlock, E., Toth, B., Berg, A., Rowlandson, T., and Ambadan, J. T.: An 11-year (2007–2017) soil moisture and precipitation dataset from the Kenaston Network in the Brightwater Creek basin, Saskatchewan, Canada, *Earth Syst. Sci. Data*, 11(2), 787–796, doi:10.5194/essd-11-787-2019, 2019.
- 665 Ulaby, F., Sarabandi, K., McDonald, K., Whitt, M., and Dobson, M.: Michigan microwave canopy scattering model, *Int. J. Remote Sens.*, 11(7), 1223–1253. doi:10.1080/01431169008955090, 1990.
- Wigneron, J.-P., Jackson, T. J., O'Neill, P., Lannoy, De, de Rosnay, P., Walker, J. P., Ferrazzoli, P., Mironov, V., Bircher, S., Grant, J. P., Kurum, M., Schwank, M., Munoz-Sabater, J., Das, N., Royer, A., Al-Yaari, A., Al Bitar, A., Fernandez-Moran, R., Lawrence, H., Mialon, A., Parrens, M., Richaume, P.,  
 670 Delwart, S., and Kerr, Y.: Modelling the passive microwave signature from land surfaces: a review of recent results and application to the L-band SMOS and SMAP soil moisture retrieval algorithms, *Remote Sens. Environ.*, 192, 238–262, doi:10.1016/j.rse.2017.01.024, 2017.
- 675 Williamson, M., Rowlandson, T., Berg, A., Roy, A., Toose, P., Derksen, C., Arnold, L., and Tetlock, E.: L-band radiometry freeze/ thaw validation using air temperature and ground measurements. *Remote Sens.*, 9(4), 403–410, doi:10.1080/2150704X.2017.1422872, 2018.
- Zhang, L., Shi, J., Zhang, Z., and Zhao, K.: The estimation of dielectric constant of frozen soil-water mixture at microwave bands. *IGARSS 2003. 2003 IEEE International Geoscience and Remote Sensing Symposium. Proceedings (IEEE Cat. No.03CH37477)*, Toulouse (France), 4, 2903–2905, doi:10.1109/IGARSS.2003.1294626, 2003.  
 680
- Zhang, L., Zhao, T., Jiang, L., and Zhao, S.: Estimate of phase transition water content in freeze–thaw process using microwave radiometer, *IEEE Trans. Geosci. Remote Sens.*, 48(12), 4248–4255, doi:10.1109/TGRS.2010.2051158, 2010.  
 685
- Zhao, T., Zhang, L., Jiang, L., Zhao, S., Chai, L., and Jin, R.: A new soil freeze/thaw discriminant algorithm using AMSR-E passive microwave imagery, *Hydrol. Process.*, 25(11), 1704–1716, doi:10.1002/hyp.7930, 2011.  
 690
- Zuerndorfer, B., England, A., Dobson, M., and Ulaby, F.: Mapping freeze/thaw boundaries with SMMR data, *Agr. Forest Meteorol.*, 52(1-2), 199–225, doi:10.1016/0168-1923(90)90106-G, 1990.



## Figures

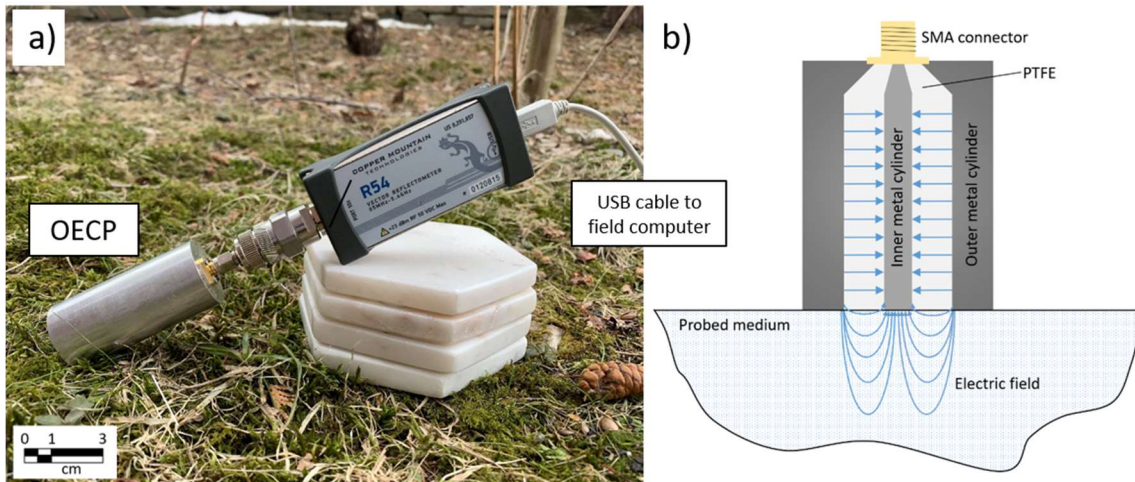

695 **Figure 1: (a) OECP for permittivity measurement. The control program provided by the Planar R54 reflectometer manufacturer is operated with a field computer. The probe is connected to the Planar R54 reflectometer using a SMA/N cable or adaptor. (b) Diagram of the electrical field produced by the OECP.**

700

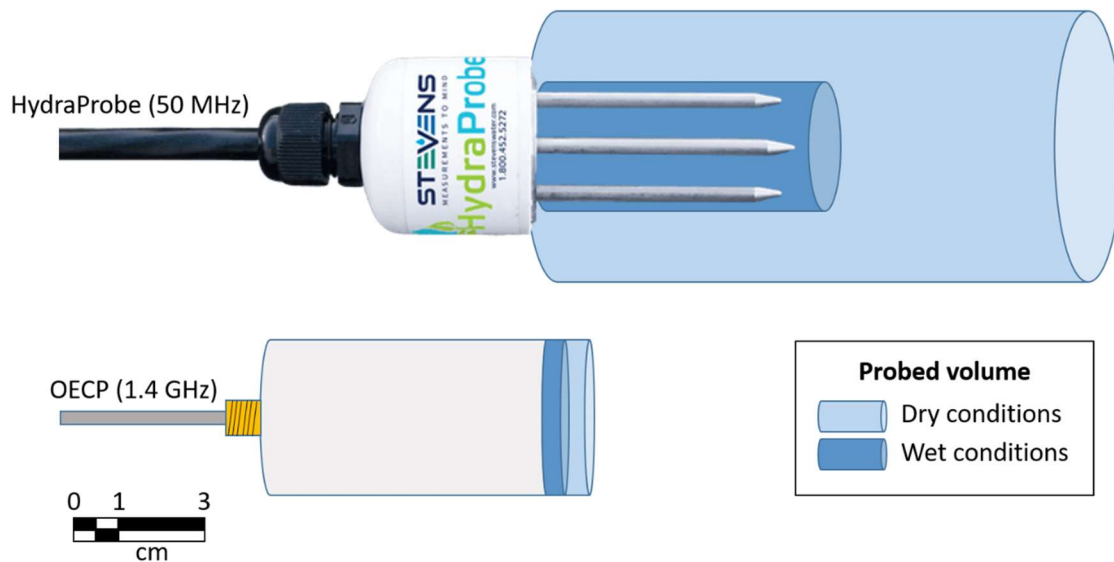

**Figure 2: Approximate probed volume (blue) of the HydraProbe (top) and OECP (bottom) for relatively dry and wet soil conditions. The probed volume is also influenced by soil type.**

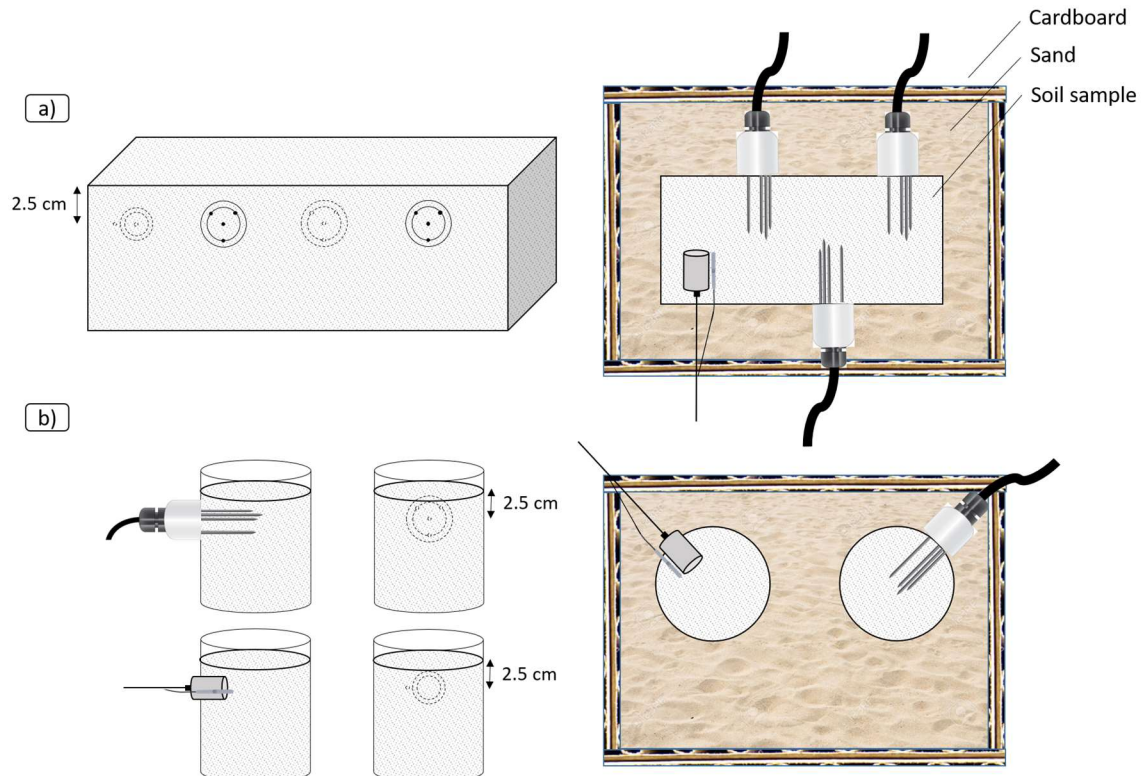

705 **Figure 3: Top view of the cold chamber experimental setup at Guelph University (Ontario, Canada) for fast transition experiment. Setup for (a) the OBS sample, 11x24x12cm for a volume of  $3.2 \times 10^3 \text{ cm}^3$  and (b) the Ontario samples, height of 12 cm and diameter of 10 cm for a volume of  $9.4 \times 10^2 \text{ cm}^3$ .**

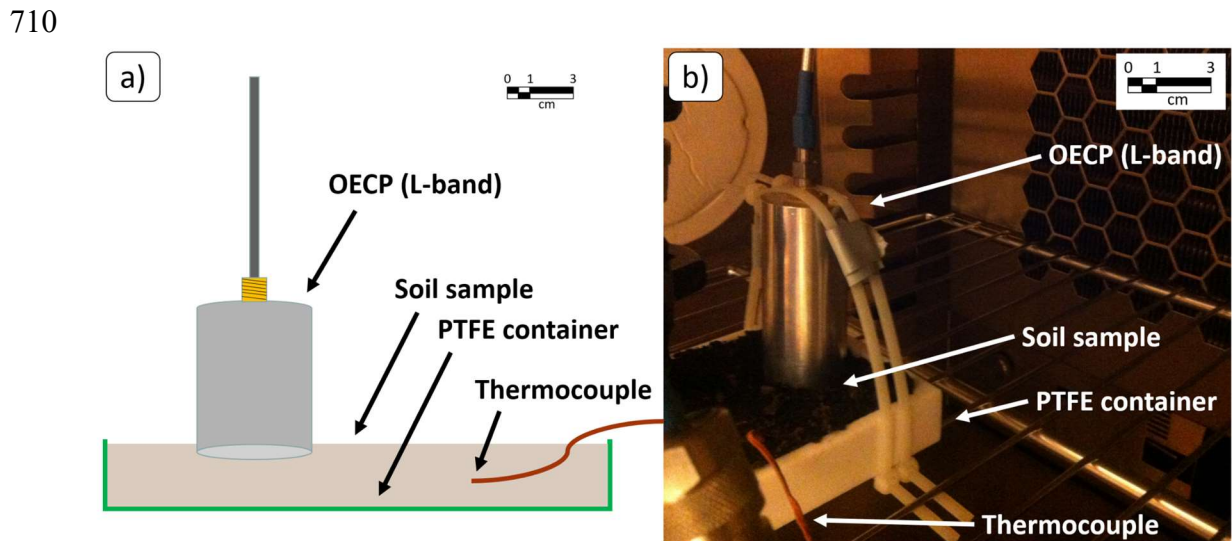

710 **Figure 4: (a) Side view and (b) photo of the cold chamber experimental setup at the Laboratoire de l'Intégration du Matériau au Système (Bordeaux, France) for the slow freeze/thaw transition.**

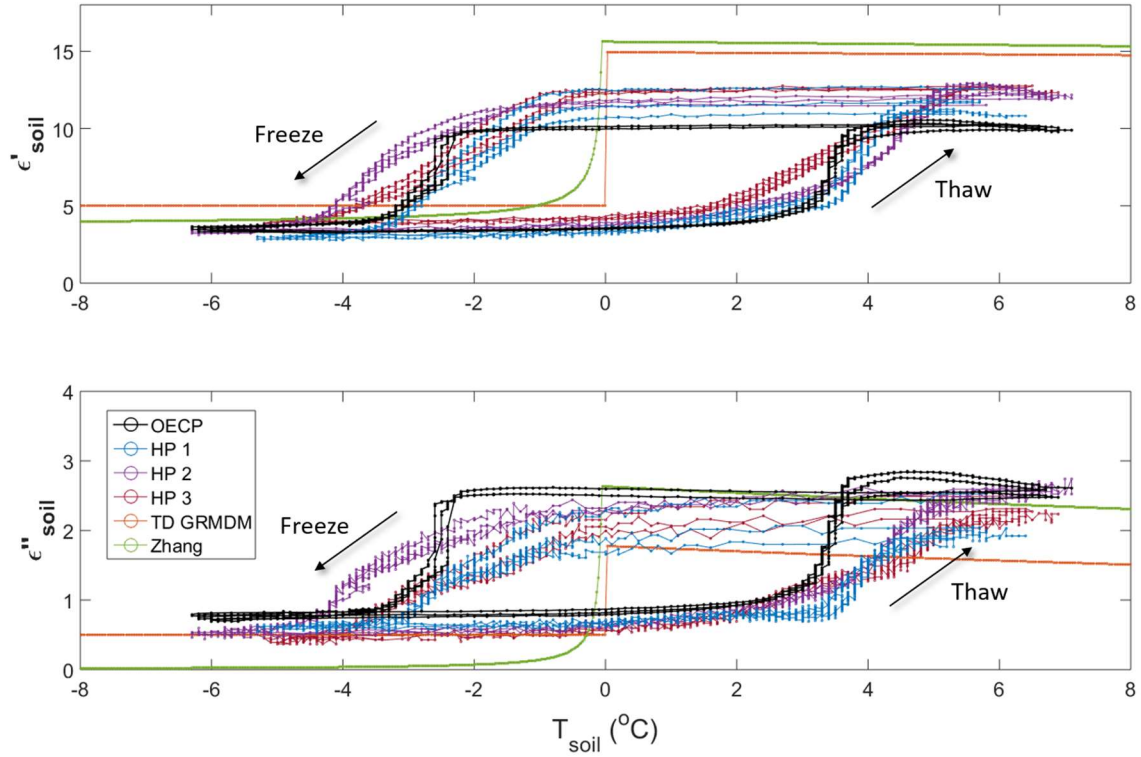

715 Figure 5: Real ( $\epsilon'$ ) and imaginary ( $\epsilon''$ ) permittivity of an organic soil sample from the Old Black Spruce site (see Table 1) during freeze/thaw cycles in a cold chamber environment. The OECP and HP instruments monitored soil permittivity, where TD GRMDM and Zhang are model results. The hysteresis effect displayed here is amplified by the experimental setup (discussed in the text). Experiment conducted from February 1<sup>st</sup> to February 7<sup>th</sup>, 2018.

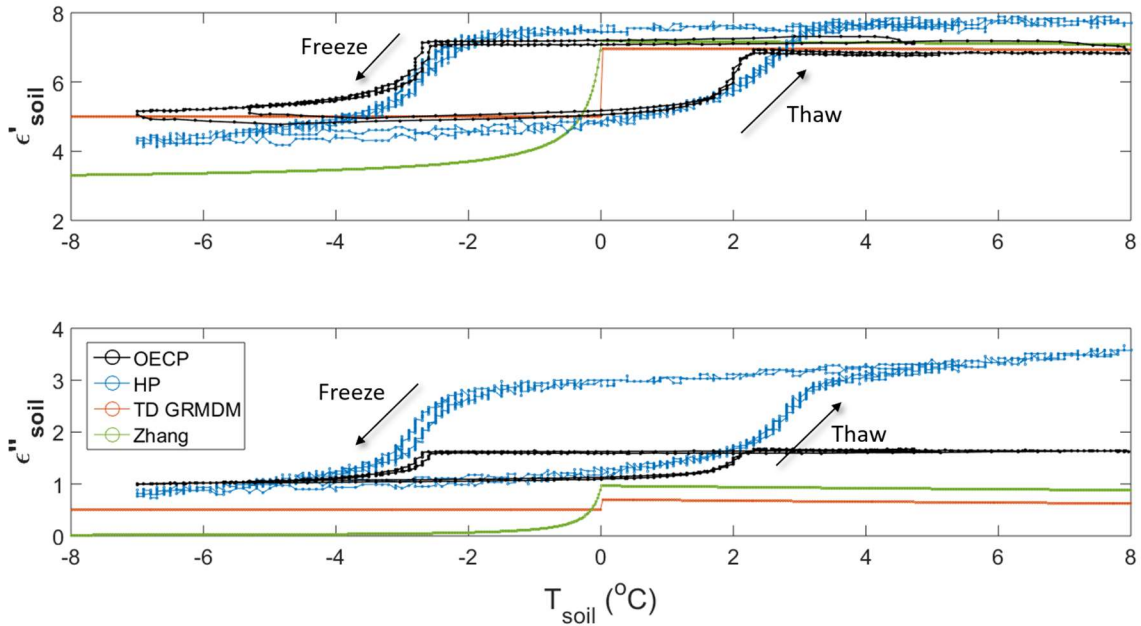

720 Figure 6: Same as Fig. 3 but for the sandy loam soil sample (see Table 1). Experiment conducted from April 15<sup>th</sup> to April 19<sup>th</sup>, 2018.

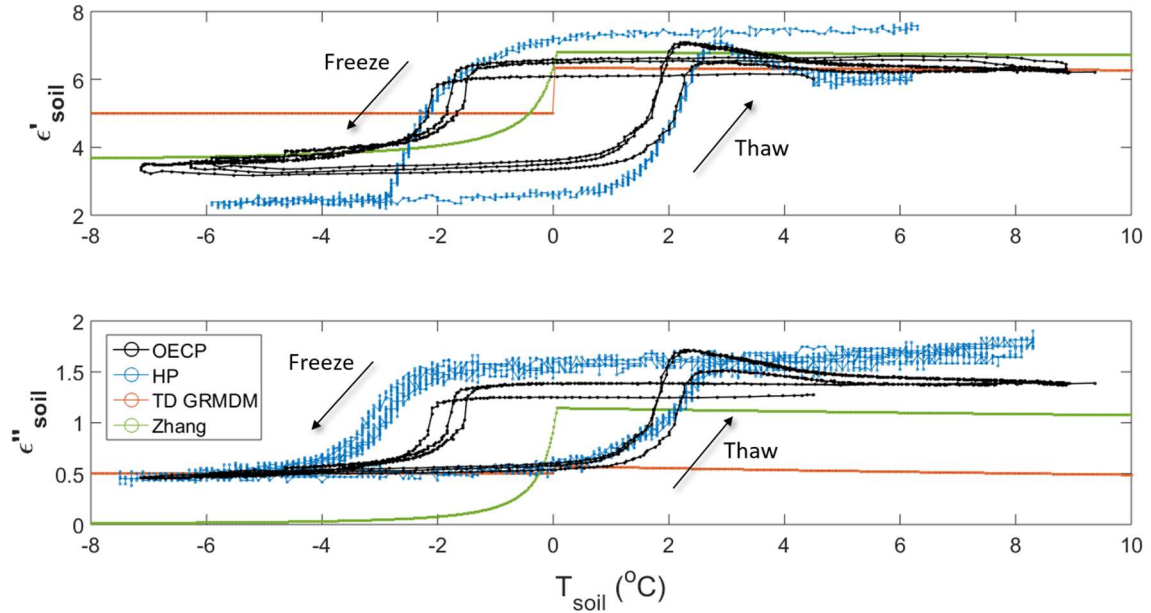

725 Figure 7: Same as Fig. 3 but for the loamy sand soil sample (see Table 1). Experiment conducted from March 29<sup>th</sup> to April 6<sup>th</sup>, 2018.

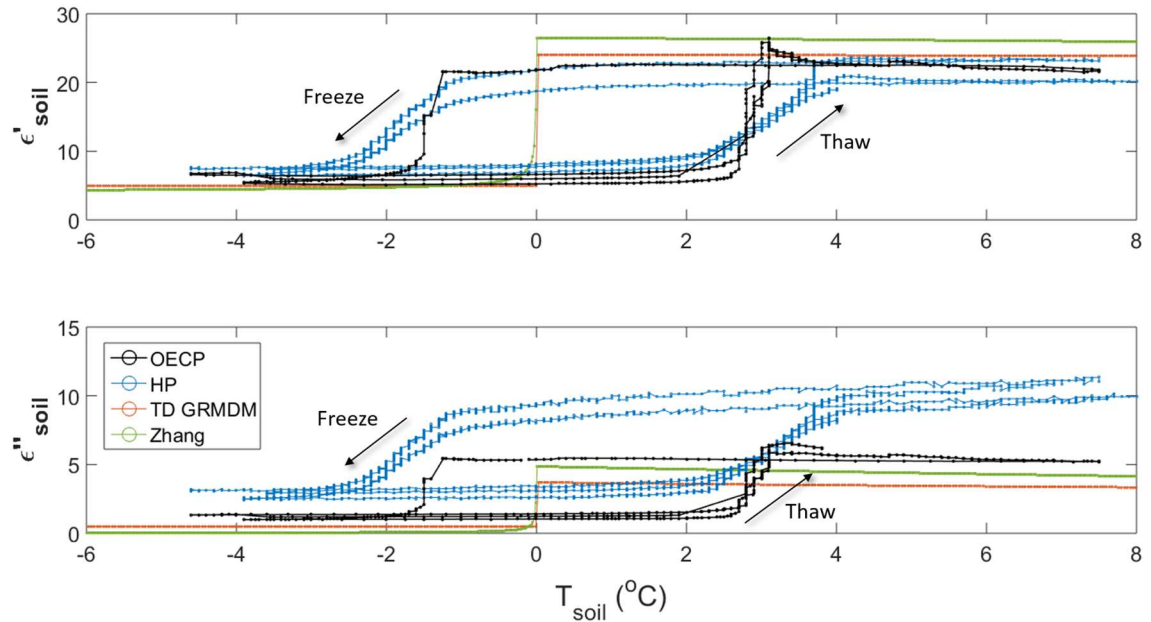

730 Figure 8: Same as Fig. 3 but for the clay loam soil sample (see Table 1). Experiment conducted from April 6<sup>th</sup> to April 15<sup>th</sup>, 2018.



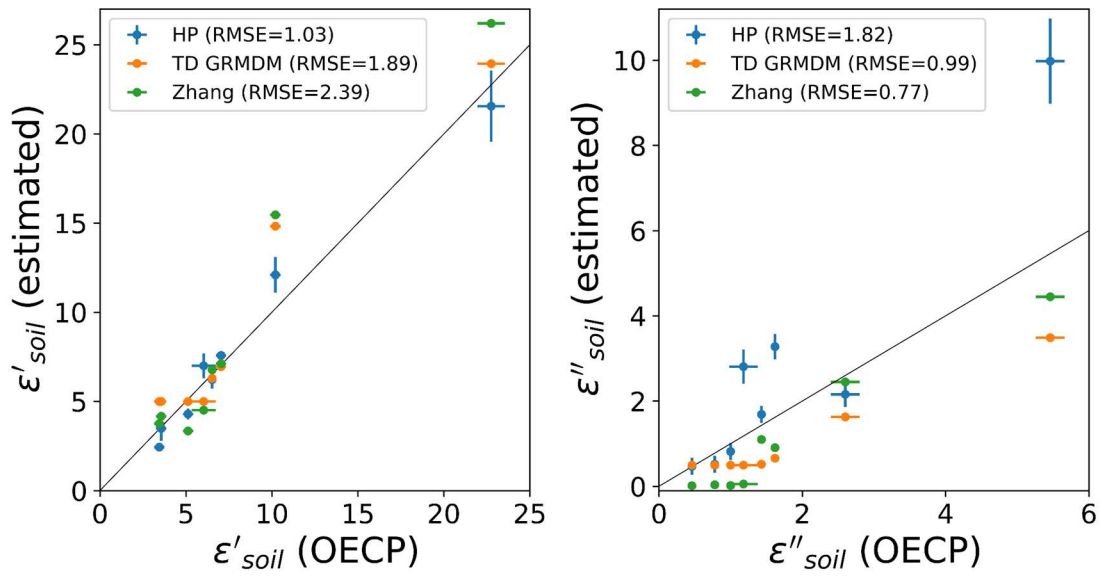

Figure 9: OECP real ( $\epsilon'$ ) and imaginary ( $\epsilon''$ ) permittivity compared to HP (instrument), TD GRMDM (model) and Zhang (model) with the OECP as the reference. The black line is the 1:1 reference ratio and the root-mean square error is given in parentheses (RMSE).

735

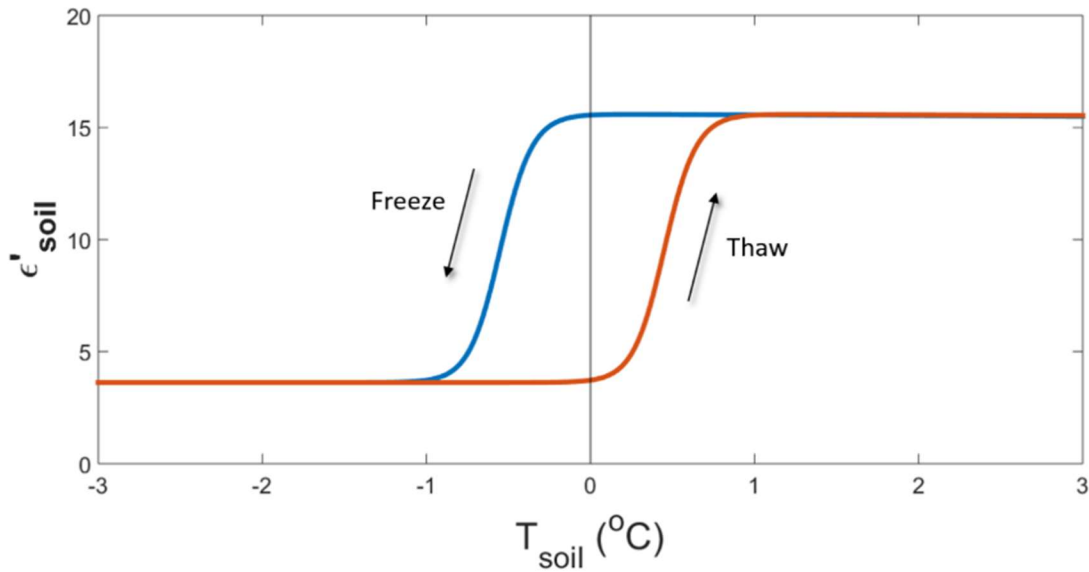

Figure 10: Expected hysteresis effect between freeze and thaw cycles. This theoretical curve was produced using an adapted version of Zhang's model and the soil composition of the OBS sample.

740

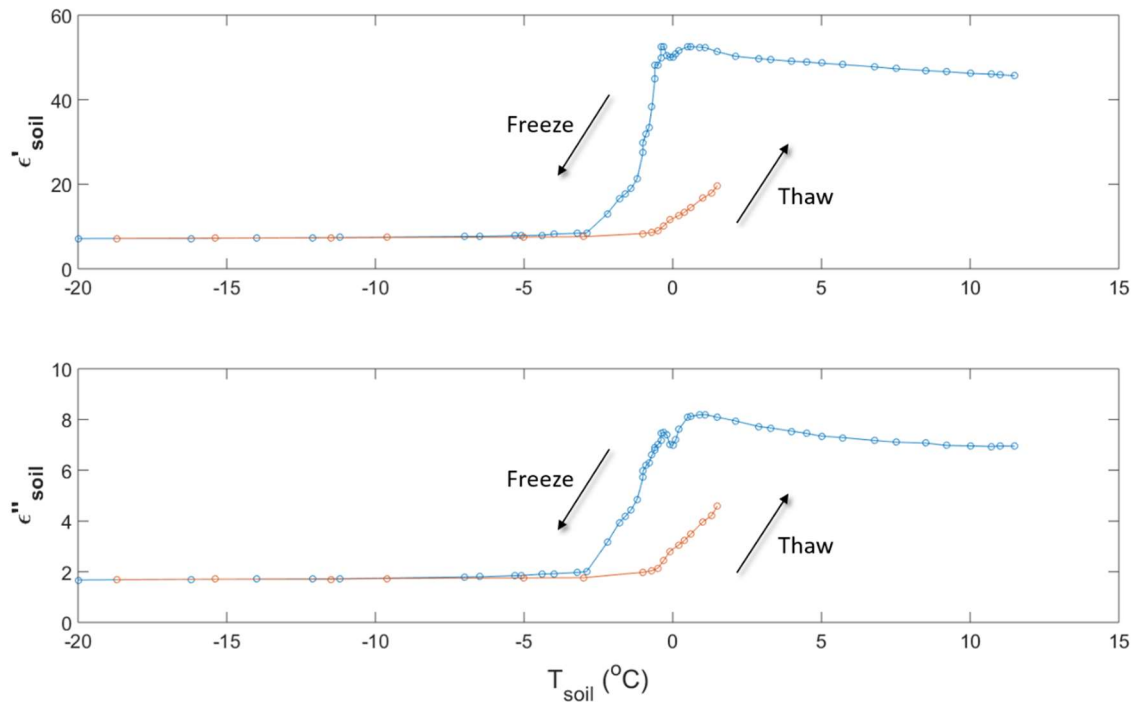

**Figure 11: Real ( $\epsilon'$ ) and imaginary ( $\epsilon''$ ) permittivity of an organic soil sample from the Old Black Spruce site (collected May 3<sup>rd</sup>, 2017) during a slow freeze/thaw cycle in a temperature-controlled chamber environment. Experiment conducted July 12<sup>th</sup>, 2017.**

745

750

755

760

765

## Tables

**Table 1: Soil composition and physical properties.** The Old Black Spruce site is located in the boreal forest in Saskatchewan, Canada, and the three other sites are located in agricultural fields in southern Ontario, Canada.  $\theta_v$  and  $\theta_G$  stands for volumetric and gravimetric liquid water content, respectively.  $\rho_d$  stands for dry bulk density.

| Soil type  | Site             | Latitude/<br>Longitude | Gravimetric composition |           |           |           | Physical properties                          |                     |                               |
|------------|------------------|------------------------|-------------------------|-----------|-----------|-----------|----------------------------------------------|---------------------|-------------------------------|
|            |                  |                        | Organic<br>%            | Clay<br>% | Sand<br>% | Silt<br>% | $\theta_v$<br>m <sup>3</sup> /m <sup>3</sup> | $\theta_G$<br>kg/kg | $\rho_d$<br>kg/m <sup>3</sup> |
| Organic    | Old Black Spruce | 53°59' N<br>105°07' W  | 59                      | 2.36      | 29.85     | 8.79      | 0.30                                         | 0.83                | 356.2                         |
| Sandy Loam | Elora            | 43°39' N<br>80°25' W   | N/A                     | 10        | 54        | 36        | 0.115                                        | 0.079               | 1450                          |
| Loamy Sand | Cambridge        | 46°26' N<br>80°20' W   | N/A                     | 2.5       | 78.4      | 19.1      | 0.068                                        | 0.038               | 1780                          |
| Clay Loam  | Dunville         | 42°52' N<br>79°44' W   | N/A                     | 28        | 33        | 39        | 0.42                                         | 0.30                | 1400                          |

**Table 2: Modelled and measured complex permittivity of thawed soils.** The permittivity in the 5°C to 6°C temperature range (stable plateau) is averaged over the multiple freeze/thaw cycles depicted in Figs. 5 through 8. Absolute and relative uncertainties (in parentheses) are based on instrument precision and measurement variability.

| Soil type  | $\epsilon'$ thawed soil |                     |          |       | $\epsilon''$ thawed soil |                      |          |       |
|------------|-------------------------|---------------------|----------|-------|--------------------------|----------------------|----------|-------|
|            | OECP                    | HP                  | TD GRMDM | Zhang | OECP                     | HP                   | TD GRMDM | Zhang |
| Organic    | 10.2<br>(±0.3/2.9%)     | 12.1<br>(±1.0/8.3%) | 14.83    | 15.46 | 2.6<br>(±0.2/7.7%)       | 2.2<br>(±0.3/13.6%)  | 1.63     | 2.45  |
| Sandy Loam | 7.0<br>(±0.3/4.3%)      | 7.6<br>(±0.2/2.6%)  | 6.95     | 7.12  | 1.62<br>(±0.04/2.5%)     | 3.3<br>(±0.3/9.1%)   | 0.66     | 0.91  |
| Loamy Sand | 6.5<br>(±0.2/3.1%)      | 6.2<br>(±0.5/8.1%)  | 6.30     | 6.77  | 1.43<br>(±0.05/3.5%)     | 1.7<br>(±0.2/11.8%)  | 0.52     | 1.10  |
| Clay Loam  | 22.8<br>(±0.8/3.5%)     | 21.7<br>(±2.0/9.2%) | 23.94    | 26.20 | 5.7<br>(±0.2/3.5%)       | 10.0<br>(±1.0/10.0%) | 3.49     | 4.45  |

**Table 3: Same as Table 2 but for frozen conditions (-5° to -6°C).**

| Soil type  | $\epsilon'$ frozen soil |                     |          |       | $\epsilon''$ frozen soil |                      |          |       |
|------------|-------------------------|---------------------|----------|-------|--------------------------|----------------------|----------|-------|
|            | OECP                    | HP                  | TD GRMDM | Zhang | OECP                     | HP                   | TD GRMDM | Zhang |
| Organic    | 3.6<br>(±0.3/8.3%)      | 3.5<br>(±0.7/20.0%) | 5        | 4.17  | 0.78<br>(±0.04/5.1%)     | 0.5<br>(±0.2/40.0%)  | 0.5      | 0.039 |
| Sandy Loam | 5.1<br>(±0.3/5.9%)      | 4.3<br>(±0.3/7.0%)  | 5        | 3.35  | 1.00<br>(±0.04/4.0%)     | 0.8<br>(±0.2/25.0%)  | 0.5      | 0.020 |
| Loamy Sand | 3.5<br>(±0.3/8.6%)      | 2.4<br>(±0.2/8.3%)  | 5        | 3.76  | 0.46<br>(±0.04/8.7%)     | 0.47<br>(±0.2/42.6%) | 0.5      | 0.017 |
| Clay Loam  | 6.0<br>(±0.7/11.7%)     | 7.0<br>(±0.7/10.0%) | 5        | 4.51  | 1.2<br>(±0.2/16.7%)      | 2.8<br>(±0.4/14.3%)  | 0.5      | 0.055 |
